# Supplementary material for: Protists Within Corals: The Hidden Diversity
Source: Front Microbiol. 2018 Aug 31;9:2043. doi: 10.3389/fmicb.2018.02043 (PMC6127297; doi:10.3389/fmicb.2018.02043)
Supplement: Supplementary file 5 [file Table_1.xlsx]

## Sheet: Supplementary Table 1
Supplementary Table 1. Sampling sites and number of P. damicornis colonies.
Region	Locality	Code	Latitude	Longitude	Number of coral colonies
Djibouti	Moucha Island	DJMI	11°43'49.27"N	43°13'26.69"E	3
	Ras Korali	DJRK	11°46'46.15"N	42°55'27.65"E	5
	Sable Blanc	DJSB	11°34'57.41"N	42°47'45.86"E	1
New Caledonia	Baie de Ste Marie	NCBS	22°17'35.86"S	166°28'14.44"E	1
	Baie de Ma’a	NCBM	22°11'45.17"S	166°20'23.67"E	3
	Grande Rade	NCGR	22°14'38.63"S	166°25'7.58"E	3
