# Supplementary material for: Protists Within Corals: The Hidden Diversity
Source: Front Microbiol. 2018 Aug 31;9:2043. doi: 10.3389/fmicb.2018.02043 (PMC6127297; doi:10.3389/fmicb.2018.02043)
Supplement: Supplementary file 6 [file Table_2.xlsx]

## Sheet: Supplementary Table 2
Supplementary Table 2. Reference sequences of Symbiodinium and two outgroups used to describe the environmental diversity of Symbiodinium.
	Accession number
Reference strain	18SV1V2	18SV4
Symbiodinium cladeA	X62650.1	KR092122.1
Symbiodinium cladeB	AY903345.1	KC848880.1
Symbiodinium cladeC	EF419289.1	KU197083.1
Symbiodinium cladeD	EF419281.1	DQ838542.1
Symbiodinium cladeG	AY160124.1	AY160124.1
Polarella glacialis	AF099183.1	KF925337.1
Pelagodinium beii	JF791066.1	KF422623.1
