# Supplementary material for: Protists Within Corals: The Hidden Diversity
Source: Front Microbiol. 2018 Aug 31;9:2043. doi: 10.3389/fmicb.2018.02043 (PMC6127297; doi:10.3389/fmicb.2018.02043)
Supplement: Supplementary file 8 [file Table_4.xlsx]

## Sheet: Supplementary Table 4
Supplementary Table 4. Abundances and annotations of OTUs.
Marker region	OTU	DJMI5	DJMI6	DJMI7	NCGR1	NCGR4	NCGR6	NCBM1	NCBM3	NCBM4	NCBS3	DJRK1	DJRK3	DJRK4	DJRK5	DJRK7	DJSB6	kingdom	phylum	division	class	order	family	genus	species	Symbiodinium clade
18V1V2	Cluster_1	29197	28070	15181	27914	46468	46729	46489	44182	42065	65405	24019	33065	35522	42785	24014	79134	Eukaryota	Opisthokonta	Metazoa	Cnidaria	Cnidaria_X	Anthozoa	Pocillopora	Pocillopora_meandrina	-
18V1V2	Cluster_10	803	592	380	0	0	0	0	0	0	0	462	498	0	492	0	29	Eukaryota	Alveolata	Dinophyta	Dinophyceae	Suessiales	Suessiales_X	Symbiodinium	Symbiodinium_sp.	D
18V1V2	Cluster_100	0	0	0	0	0	0	0	0	0	0	0	0	0	0	0	4	Eukaryota	Opisthokonta	Metazoa	Cnidaria	Cnidaria_X	Anthozoa	Pocillopora	Pocillopora_meandrina	-
18V1V2	Cluster_11	7	0	134	0	0	0	0	0	0	0	230	351	0	0	982	492	Eukaryota	Opisthokonta	Metazoa	Cnidaria	Cnidaria_X	Anthozoa	Pocillopora	Pocillopora_meandrina	-
18V1V2	Cluster_111	0	0	0	0	4	0	0	0	0	0	0	0	0	0	0	0	Eukaryota	Opisthokonta	Fungi	Multi-affiliation	Multi-affiliation	Multi-affiliation	Multi-affiliation	Multi-affiliation	-
18V1V2	Cluster_112	0	0	0	0	0	0	0	0	0	0	0	0	3	0	0	0	Eukaryota	Opisthokonta	Fungi	Ascomycota	Pezizomycotina	Multi-affiliation	Multi-affiliation	Multi-affiliation	-
18V1V2	Cluster_113	0	0	0	0	0	0	0	0	0	0	0	0	4	0	0	0	Eukaryota	Alveolata	Dinophyta	Dinophyceae	Suessiales	Suessiales_X	Symbiodinium	Symbiodinium_sp.	A
18V1V2	Cluster_114	0	0	0	0	0	0	0	0	0	0	3	0	0	0	0	0	Eukaryota	Alveolata	Dinophyta	Dinophyceae	Suessiales	Suessiales_X	Symbiodinium	Symbiodinium_sp.	D
18V1V2	Cluster_115	0	0	0	0	0	0	0	0	0	0	0	0	0	3	0	0	Eukaryota	Alveolata	Dinophyta	Dinophyceae	Suessiales	Suessiales_X	Symbiodinium	Symbiodinium_sp.	D
18V1V2	Cluster_116	0	0	0	0	3	0	0	0	0	0	0	0	0	0	0	0	Eukaryota	Alveolata	Dinophyta	Dinophyceae	Suessiales	Suessiales_X	Symbiodinium	Symbiodinium_sp.	C
18V1V2	Cluster_117	0	3	0	0	0	0	0	0	0	0	0	0	0	0	0	0	Eukaryota	Alveolata	Dinophyta	Dinophyceae	Suessiales	Suessiales_X	Symbiodinium	Symbiodinium_sp.	D
18V1V2	Cluster_118	0	0	0	0	0	0	0	0	0	0	0	3	0	0	0	0	Eukaryota	Alveolata	Dinophyta	Dinophyceae	Suessiales	Suessiales_X	Symbiodinium	Symbiodinium_sp.	D
18V1V2	Cluster_119	0	0	0	0	0	0	0	3	0	0	0	0	0	0	0	0	Eukaryota	Alveolata	Dinophyta	Dinophyceae	Suessiales	Suessiales_X	Symbiodinium	Symbiodinium_sp.	C
18V1V2	Cluster_12	16	93	274	0	0	0	0	87	0	0	326	94	91	923	5	152	Eukaryota	Alveolata	Apicomplexa	Apicomplexa_X	Coccidia	Coccidia-un.-Symbiont	Coccidia-un.-Symbiont_X	Coccidia-un.-Symbiont_X_sp.	-
18V1V2	Cluster_120	0	0	0	0	0	3	0	0	0	0	0	0	0	0	0	0	Eukaryota	Alveolata	Dinophyta	Dinophyceae	Suessiales	Suessiales_X	Symbiodinium	Symbiodinium_sp.	C
18V1V2	Cluster_121	0	0	0	0	0	0	0	0	0	0	0	0	0	3	0	0	Eukaryota	Alveolata	Dinophyta	Dinophyceae	Suessiales	Suessiales_X	Symbiodinium	Symbiodinium_sp.	D
18V1V2	Cluster_122	0	0	0	0	0	0	0	0	0	0	0	0	0	5	0	0	Eukaryota	Alveolata	Dinophyta	Dinophyceae	Suessiales	Suessiales_X	Symbiodinium	Symbiodinium_sp.	D
18V1V2	Cluster_123	0	0	3	0	0	0	0	0	0	0	0	0	0	0	0	0	Eukaryota	Alveolata	Dinophyta	Dinophyceae	Suessiales	Suessiales_X	Symbiodinium	Symbiodinium_sp.	D
18V1V2	Cluster_124	0	0	0	0	0	0	0	0	0	0	0	0	0	3	0	0	Eukaryota	Alveolata	Dinophyta	Dinophyceae	Suessiales	Suessiales_X	Symbiodinium	Symbiodinium_sp.	D
18V1V2	Cluster_126	0	0	0	0	0	0	0	0	0	0	0	0	0	3	0	0	Eukaryota	Opisthokonta	Fungi	Basidiomycota	Agaricomycotina	Agaricomycetes	Itersonilia	Itersonilia_perplexans	-
18V1V2	Cluster_128	0	0	0	0	0	0	0	0	0	0	0	0	0	0	4	0	Eukaryota	Archaeplastida	Streptophyta	Embryophyceae	Embryophyceae_X	Embryophyceae_XX	Zostera	Zostera_noltei	-
18V1V2	Cluster_129	3	0	0	0	0	0	0	0	0	0	0	0	0	0	0	0	Eukaryota	Archaeplastida	Streptophyta	Embryophyceae	Embryophyceae_X	Embryophyceae_XX	Cupressus	Cupressus_gigantea	-
18V1V2	Cluster_13	0	0	0	0	0	0	1842	0	0	0	0	0	0	0	0	0	Eukaryota	Alveolata	Dinophyta	Dinophyceae	Suessiales	Suessiales_X	Symbiodinium	Symbiodinium_sp.	C
18V1V2	Cluster_130	0	3	0	0	0	0	0	0	0	0	0	0	0	0	0	0	Eukaryota	Alveolata	Dinophyta	Dinophyceae	Suessiales	Suessiales_X	Symbiodinium	Symbiodinium_sp.	D
18V1V2	Cluster_131	0	0	0	0	0	0	0	0	0	0	0	0	0	3	0	0	Eukaryota	Opisthokonta	Metazoa	Cnidaria	Cnidaria_X	Anthozoa	Pocillopora	Pocillopora_meandrina	-
18V1V2	Cluster_132	3	0	0	0	0	0	0	0	0	0	0	0	0	0	0	0	Eukaryota	Opisthokonta	Metazoa	Cnidaria	Cnidaria_X	Anthozoa	Pocillopora	Pocillopora_meandrina	-
18V1V2	Cluster_133	0	0	0	3	0	0	0	0	0	0	0	0	0	0	0	0	Eukaryota	Opisthokonta	Metazoa	Cnidaria	Cnidaria_X	Anthozoa	Pocillopora	Pocillopora_meandrina	-
18V1V2	Cluster_136	0	0	0	0	0	0	0	0	0	0	0	0	0	0	0	3	Eukaryota	Stramenopiles	Ochrophyta	Bacillariophyta	Bacillariophyta_X	Raphid-pennate	Multi-affiliation	Multi-affiliation	-
18V1V2	Cluster_14	732	231	531	0	0	0	0	0	0	0	14	0	0	51	0	4	Eukaryota	Alveolata	Apicomplexa	Apicomplexa_X	Coccidia	Coccidia-un.-Symbiont	Coccidia-un.-Symbiont_X	Coccidia-un.-Symbiont_X_sp.	-
18V1V2	Cluster_141	0	0	0	0	0	0	0	0	0	0	0	0	0	0	4	0	Eukaryota	Alveolata	Dinophyta	Dinophyceae	Suessiales	Suessiales_X	Symbiodinium	Symbiodinium_sp.	A
18V1V2	Cluster_143	0	0	0	0	0	0	0	0	0	0	0	0	3	0	0	0	Eukaryota	Alveolata	Dinophyta	Dinophyceae	Suessiales	Suessiales_X	Symbiodinium	Symbiodinium_sp.	A
18V1V2	Cluster_144	0	0	0	0	0	0	0	0	0	0	0	0	0	0	3	0	Eukaryota	Alveolata	Dinophyta	Dinophyceae	Suessiales	Suessiales_X	Symbiodinium	Symbiodinium_sp.	A
18V1V2	Cluster_145	0	0	3	0	0	0	0	0	0	0	0	0	0	0	0	0	Eukaryota	Alveolata	Dinophyta	Dinophyceae	Suessiales	Suessiales_X	Symbiodinium	Symbiodinium_sp.	D
18V1V2	Cluster_146	0	0	0	0	3	0	0	0	0	0	0	0	0	0	0	0	Eukaryota	Alveolata	Dinophyta	Dinophyceae	Suessiales	Suessiales_X	Symbiodinium	Symbiodinium_sp.	C
18V1V2	Cluster_147	0	0	0	0	0	0	0	3	0	0	0	0	0	0	0	0	Eukaryota	Alveolata	Dinophyta	Dinophyceae	Suessiales	Suessiales_X	Symbiodinium	Symbiodinium_sp.	C
18V1V2	Cluster_149	0	0	0	0	0	0	0	0	3	0	0	0	0	0	0	0	Eukaryota	Alveolata	Dinophyta	Dinophyceae	Suessiales	Suessiales_X	Symbiodinium	Symbiodinium_sp.	C
18V1V2	Cluster_15	0	0	0	0	0	0	0	0	0	0	0	0	552	0	243	212	Eukaryota	Alveolata	Dinophyta	Dinophyceae	Suessiales	Suessiales_X	Symbiodinium	Symbiodinium_sp.	A
18V1V2	Cluster_150	0	0	0	0	0	0	0	0	0	0	0	0	0	3	0	0	Eukaryota	Alveolata	Dinophyta	Dinophyceae	Suessiales	Suessiales_X	Symbiodinium	Symbiodinium_sp.	D
18V1V2	Cluster_151	0	0	3	0	0	0	0	0	0	0	0	0	0	0	0	0	Eukaryota	Alveolata	Dinophyta	Dinophyceae	Suessiales	Suessiales_X	Symbiodinium	Symbiodinium_sp.	D
18V1V2	Cluster_155	0	0	0	0	0	3	0	0	0	0	0	0	0	0	0	0	Eukaryota	Opisthokonta	Metazoa	Cnidaria	Cnidaria_X	Anthozoa	Pocillopora	Pocillopora_meandrina	-
18V1V2	Cluster_157	0	0	0	0	0	0	0	0	0	0	0	0	0	3	0	0	Eukaryota	Opisthokonta	Metazoa	Cnidaria	Cnidaria_X	Anthozoa	Pocillopora	Pocillopora_meandrina	-
18V1V2	Cluster_158	0	4	0	0	0	0	0	0	0	0	0	0	0	0	0	0	Eukaryota	Opisthokonta	Metazoa	Cnidaria	Cnidaria_X	Anthozoa	Pocillopora	Pocillopora_meandrina	-
18V1V2	Cluster_159	0	0	0	0	0	0	0	0	0	0	3	0	0	0	0	0	Eukaryota	Alveolata	Dinophyta	Dinophyceae	Suessiales	Suessiales_X	Symbiodinium	Symbiodinium_sp.	D
18V1V2	Cluster_16	39	27	51	39	74	65	50	81	55	82	40	49	76	94	43	160	Eukaryota	Opisthokonta	Metazoa	Cnidaria	Cnidaria_X	Anthozoa	Pocillopora	Pocillopora_meandrina	-
18V1V2	Cluster_160	0	0	0	0	0	3	0	0	0	0	0	0	0	0	0	0	Eukaryota	Alveolata	Dinophyta	Dinophyceae	Dinophyceae_X	Dinophyceae_XX	Scrippsiella	Scrippsiella_trochoidea	-
18V1V2	Cluster_163	0	0	0	0	0	0	0	0	0	3	0	0	0	0	0	0	Eukaryota	Opisthokonta	Metazoa	Cnidaria	Cnidaria_X	Anthozoa	Pocillopora	Pocillopora_meandrina	-
18V1V2	Cluster_165	0	0	0	0	0	0	3	0	0	0	0	0	0	0	0	0	Eukaryota	Opisthokonta	Metazoa	Cnidaria	Cnidaria_X	Anthozoa	Pocillopora	Pocillopora_meandrina	-
18V1V2	Cluster_17	0	25	556	0	0	0	0	0	0	0	0	0	0	296	0	41	Eukaryota	Alveolata	Dinophyta	Dinophyceae	Suessiales	Suessiales_X	Symbiodinium	Symbiodinium_sp.	D
18V1V2	Cluster_17452	0	0	0	0	0	0	3	0	0	0	0	0	0	0	0	0	Eukaryota	Opisthokonta	Metazoa	Cnidaria	Cnidaria_X	Anthozoa	Pocillopora	Pocillopora_meandrina	-
18V1V2	Cluster_17678	4	0	0	0	0	0	0	0	0	0	0	0	0	0	0	0	Eukaryota	Opisthokonta	Metazoa	Cnidaria	Cnidaria_X	Anthozoa	Pocillopora	Pocillopora_meandrina	-
18V1V2	Cluster_1769	0	0	0	0	0	0	0	0	0	0	0	0	3	0	0	0	Eukaryota	Alveolata	Dinophyta	Dinophyceae	Suessiales	Suessiales_X	Symbiodinium	Multi-affiliation	A
18V1V2	Cluster_18	0	0	0	0	0	0	0	0	0	0	0	510	0	0	0	0	Eukaryota	Opisthokonta	Metazoa	Cnidaria	Cnidaria_X	Anthozoa	Pocillopora	Pocillopora_meandrina	-
18V1V2	Cluster_185	0	0	0	0	0	0	0	0	0	0	0	0	3	0	0	0	Eukaryota	Alveolata	Dinophyta	Dinophyceae	Suessiales	Suessiales_X	Symbiodinium	Multi-affiliation	A
18V1V2	Cluster_192	0	0	0	0	0	0	0	0	0	0	3	0	0	0	0	0	Eukaryota	Alveolata	Dinophyta	Dinophyceae	Suessiales	Suessiales_X	Symbiodinium	Symbiodinium_sp.	D
18V1V2	Cluster_2	13829	43022	33342	0	0	0	0	0	0	0	12138	13167	29	29923	123	2956	Eukaryota	Alveolata	Dinophyta	Dinophyceae	Suessiales	Suessiales_X	Symbiodinium	Symbiodinium_sp.	D
18V1V2	Cluster_20	0	0	0	0	0	0	0	485	0	0	0	0	0	0	0	0	Eukaryota	Alveolata	Dinophyta	Dinophyceae	Suessiales	Suessiales_X	Symbiodinium	Symbiodinium_sp.	C
18V1V2	Cluster_201	0	0	0	0	0	0	0	0	0	0	0	0	0	3	0	0	Eukaryota	Alveolata	Dinophyta	Dinophyceae	Suessiales	Suessiales_X	Symbiodinium	Symbiodinium_sp.	D
18V1V2	Cluster_206	0	0	0	3	0	0	0	0	0	0	0	0	0	0	0	0	Eukaryota	Alveolata	Dinophyta	Dinophyceae	Suessiales	Suessiales_X	Symbiodinium	Symbiodinium_sp.	C
18V1V2	Cluster_21	0	0	0	0	0	0	0	0	0	0	0	0	305	0	49	60	Eukaryota	Alveolata	Dinophyta	Dinophyceae	Suessiales	Suessiales_X	Symbiodinium	Symbiodinium_sp.	A
18V1V2	Cluster_21658	0	0	0	0	0	0	0	0	0	0	0	0	0	0	3	0	Eukaryota	Opisthokonta	Metazoa	Cnidaria	Cnidaria_X	Anthozoa	Pocillopora	Pocillopora_meandrina	-
18V1V2	Cluster_22	0	0	0	3	0	0	327	0	0	0	0	0	0	0	0	0	Eukaryota	Alveolata	Dinophyta	Dinophyceae	Suessiales	Suessiales_X	Symbiodinium	Symbiodinium_sp.	C
18V1V2	Cluster_22068	0	0	0	0	0	0	0	0	0	0	0	0	0	0	0	3	Eukaryota	Opisthokonta	Metazoa	Cnidaria	Cnidaria_X	Anthozoa	Pocillopora	Pocillopora_meandrina	-
18V1V2	Cluster_221	0	0	3	0	0	0	0	0	0	0	0	0	0	0	0	0	Eukaryota	Alveolata	Dinophyta	Dinophyceae	Suessiales	Suessiales_X	Symbiodinium	Symbiodinium_sp.	D
18V1V2	Cluster_22541	0	0	0	0	0	0	3	0	0	0	0	0	0	0	0	0	Eukaryota	Opisthokonta	Metazoa	Cnidaria	Cnidaria_X	Anthozoa	Pocillopora	Pocillopora_meandrina	-
18V1V2	Cluster_23	50	0	312	0	0	0	0	0	0	0	0	0	0	0	0	0	Eukaryota	Archaeplastida	Streptophyta	Embryophyceae	Embryophyceae_X	Embryophyceae_XX	Hevea	Hevea_brasiliensis	-
18V1V2	Cluster_231	3	0	0	0	0	0	0	0	0	0	0	0	0	0	0	0	Eukaryota	Alveolata	Dinophyta	Dinophyceae	Suessiales	Suessiales_X	Symbiodinium	Symbiodinium_sp.	D
18V1V2	Cluster_233	0	0	5	0	0	0	0	0	0	0	0	0	0	3	0	0	Eukaryota	Alveolata	Dinophyta	Dinophyceae	Suessiales	Suessiales_X	Symbiodinium	Symbiodinium_sp.	D
18V1V2	Cluster_2335	0	0	0	0	0	0	0	0	0	0	0	0	0	5	0	0	Eukaryota	Alveolata	Dinophyta	Dinophyceae	Suessiales	Suessiales_X	Symbiodinium	Symbiodinium_sp.	D
18V1V2	Cluster_2358	0	0	0	0	0	0	0	0	0	0	0	0	0	3	0	0	Eukaryota	Alveolata	Dinophyta	Dinophyceae	Suessiales	Suessiales_X	Symbiodinium	Symbiodinium_sp.	D
18V1V2	Cluster_2399	0	0	0	0	0	0	0	0	0	0	4	0	0	0	0	0	Eukaryota	Alveolata	Dinophyta	Dinophyceae	Suessiales	Suessiales_X	Symbiodinium	Symbiodinium_sp.	D
18V1V2	Cluster_24	0	0	0	0	0	0	0	185	0	0	0	0	0	0	0	0	Eukaryota	Alveolata	Dinophyta	Dinophyceae	Suessiales	Suessiales_X	Symbiodinium	Symbiodinium_sp.	C
18V1V2	Cluster_241	0	3	0	0	0	0	0	0	0	0	0	0	0	0	0	0	Eukaryota	Alveolata	Dinophyta	Dinophyceae	Suessiales	Suessiales_X	Symbiodinium	Symbiodinium_sp.	D
18V1V2	Cluster_247	3	0	0	0	0	0	0	0	0	0	0	0	0	0	0	0	Eukaryota	Alveolata	Dinophyta	Dinophyceae	Suessiales	Suessiales_X	Symbiodinium	Symbiodinium_sp.	D
18V1V2	Cluster_25	0	0	0	0	0	0	0	0	0	0	0	0	0	31	0	120	Eukaryota	Alveolata	Apicomplexa	Apicomplexa_X	Coccidia	Coccidia-un.-Symbiont	Coccidia-un.-Symbiont_X	Coccidia-un.-Symbiont_X_sp.	-
18V1V2	Cluster_2532	0	0	0	0	0	0	0	0	0	0	3	0	0	0	0	0	Eukaryota	Alveolata	Dinophyta	Dinophyceae	Suessiales	Suessiales_X	Symbiodinium	Symbiodinium_sp.	D
18V1V2	Cluster_256	0	0	3	0	0	0	0	0	0	0	0	0	0	0	0	0	Eukaryota	Alveolata	Dinophyta	Dinophyceae	Suessiales	Suessiales_X	Symbiodinium	Symbiodinium_sp.	D
18V1V2	Cluster_26	14	39	49	0	0	0	0	0	0	0	19	19	0	22	0	4	Eukaryota	Alveolata	Dinophyta	Dinophyceae	Suessiales	Suessiales_X	Symbiodinium	Symbiodinium_sp.	D
18V1V2	Cluster_266	6	0	0	0	0	0	0	0	0	0	0	0	0	0	0	0	Eukaryota	Opisthokonta	Fungi	Basidiomycota	Agaricomycotina	Agaricomycetes	Dentocorticium	Dentocorticium_sulphurellum	-
18V1V2	Cluster_27	0	120	0	0	0	0	0	0	0	0	0	0	0	0	0	0	Eukaryota	Alveolata	Dinophyta	Dinophyceae	Suessiales	Suessiales_X	Symbiodinium	Symbiodinium_sp.	D
18V1V2	Cluster_27742	0	0	0	0	0	0	0	0	0	3	0	0	0	0	0	0	Eukaryota	Opisthokonta	Metazoa	Cnidaria	Cnidaria_X	Anthozoa	Pocillopora	Pocillopora_meandrina	-
18V1V2	Cluster_28	0	0	0	0	0	0	0	0	0	0	0	102	0	0	0	0	Eukaryota	Alveolata	Dinophyta	Dinophyceae	Suessiales	Suessiales_X	Symbiodinium	Symbiodinium_sp.	D
18V1V2	Cluster_29	0	0	0	3	21	70	0	0	0	0	0	0	0	0	0	0	Eukaryota	Alveolata	Dinophyta	Dinophyceae	Suessiales	Suessiales_X	Symbiodinium	Symbiodinium_sp.	C
18V1V2	Cluster_3	0	0	0	7381	10778	17658	3196	9247	12116	623	0	0	0	0	0	0	Eukaryota	Alveolata	Dinophyta	Dinophyceae	Suessiales	Suessiales_X	Symbiodinium	Symbiodinium_sp.	C
18V1V2	Cluster_30	4	9	6	0	9	8	9	8	8	7	4	0	4	9	4	12	Eukaryota	Archaeplastida	Streptophyta	Embryophyceae	Embryophyceae_X	Embryophyceae_XX	Multi-affiliation	Multi-affiliation	-
18V1V2	Cluster_300	0	0	0	0	3	0	0	0	0	0	0	0	0	0	0	0	Eukaryota	Opisthokonta	Metazoa	Cnidaria	Cnidaria_X	Anthozoa	Pocillopora	Pocillopora_meandrina	-
18V1V2	Cluster_32	0	0	0	0	0	0	0	0	0	0	0	78	0	0	0	0	Eukaryota	Alveolata	Dinophyta	Dinophyceae	Suessiales	Suessiales_X	Symbiodinium	Symbiodinium_sp.	D
18V1V2	Cluster_326	0	0	0	0	3	0	0	0	0	0	0	0	0	0	0	0	Eukaryota	Alveolata	Ciliophora	Oligohymenophorea	Peritrichia	Zoothamniidae	Zoothamnopsis	Zoothamnopsis_sinica	-
18V1V2	Cluster_33	73	0	0	0	0	0	0	0	0	0	0	0	0	0	0	0	Eukaryota	Archaeplastida	Streptophyta	Embryophyceae	Embryophyceae_X	Embryophyceae_XX	Cupressus	Cupressus_gigantea	-
18V1V2	Cluster_337	0	0	0	0	0	0	0	0	0	0	0	0	0	0	3	0	Eukaryota	Alveolata	Dinophyta	Dinophyceae	Suessiales	Suessiales_X	Symbiodinium	Symbiodinium_sp.	A
18V1V2	Cluster_339	0	0	0	0	0	0	0	0	0	0	0	0	3	0	0	0	Eukaryota	Alveolata	Dinophyta	Dinophyceae	Suessiales	Suessiales_X	Symbiodinium	Symbiodinium_sp.	A
18V1V2	Cluster_3408	0	0	0	0	0	3	0	0	0	0	0	0	0	0	0	0	Eukaryota	Alveolata	Dinophyta	Dinophyceae	Suessiales	Suessiales_X	Symbiodinium	Symbiodinium_sp.	C
18V1V2	Cluster_35	0	0	0	0	0	0	0	0	0	0	54	0	0	0	0	0	Eukaryota	Alveolata	Dinophyta	Dinophyceae	Suessiales	Suessiales_X	Symbiodinium	Symbiodinium_sp.	D
18V1V2	Cluster_355	0	0	4	0	0	0	0	0	0	0	0	0	0	0	0	0	Eukaryota	Alveolata	Dinophyta	Dinophyceae	Suessiales	Suessiales_X	Symbiodinium	Symbiodinium_sp.	D
18V1V2	Cluster_36	0	0	0	0	0	0	0	0	0	0	0	0	0	0	0	53	Eukaryota	Alveolata	Ciliophora	Spirotrichea	Licnophoria	Licnophoridae	Licnophora	Licnophora_macfarlandi	-
18V1V2	Cluster_367	0	0	0	3	0	0	0	0	0	0	0	0	0	0	0	0	Eukaryota	Alveolata	Dinophyta	Dinophyceae	Suessiales	Suessiales_X	Symbiodinium	Symbiodinium_sp.	C
18V1V2	Cluster_376	0	0	3	0	0	0	0	0	0	0	0	0	0	0	0	0	Eukaryota	Alveolata	Dinophyta	Dinophyceae	Suessiales	Suessiales_X	Symbiodinium	Symbiodinium_sp.	D
18V1V2	Cluster_386	4	0	0	0	0	0	0	0	0	0	0	0	0	0	0	0	Eukaryota	Alveolata	Dinophyta	Dinophyceae	Suessiales	Suessiales_X	Symbiodinium	Symbiodinium_sp.	D
18V1V2	Cluster_39	25	0	0	0	0	0	0	0	0	0	0	0	0	19	0	0	Eukaryota	Archaeplastida	Streptophyta	Embryophyceae	Embryophyceae_X	Embryophyceae_XX	Cupressus	Cupressus_gigantea	-
18V1V2	Cluster_390	0	0	0	0	0	0	0	0	0	0	0	3	0	0	0	0	Eukaryota	Alveolata	Dinophyta	Dinophyceae	Suessiales	Suessiales_X	Symbiodinium	Symbiodinium_sp.	D
18V1V2	Cluster_4	49	0	0	0	0	0	0	0	0	0	10	3	17528	0	9797	4350	Eukaryota	Alveolata	Dinophyta	Dinophyceae	Suessiales	Suessiales_X	Symbiodinium	Symbiodinium_sp.	A
18V1V2	Cluster_40	50	0	0	0	0	0	0	0	0	0	0	0	0	0	0	0	Eukaryota	Archaeplastida	Streptophyta	Embryophyceae	Embryophyceae_X	Embryophyceae_XX	Cupressus	Cupressus_gigantea	-
18V1V2	Cluster_405	0	0	3	0	0	0	0	0	0	0	0	0	0	0	0	0	Eukaryota	Opisthokonta	Metazoa	Cnidaria	Cnidaria_X	Anthozoa	Pocillopora	Pocillopora_meandrina	-
18V1V2	Cluster_41	0	0	0	0	0	0	0	45	0	0	0	0	0	0	0	0	Eukaryota	Alveolata	Dinophyta	Dinophyceae	Suessiales	Suessiales_X	Symbiodinium	Symbiodinium_sp.	C
18V1V2	Cluster_42	0	0	26	0	0	0	0	0	0	0	9	0	0	15	0	0	Eukaryota	Alveolata	Dinophyta	Dinophyceae	Suessiales	Suessiales_X	Symbiodinium	Symbiodinium_sp.	D
18V1V2	Cluster_43	0	0	0	0	25	13	5	11	9	6	0	0	0	0	0	0	Eukaryota	Alveolata	Dinophyta	Dinophyceae	Suessiales	Suessiales_X	Symbiodinium	Symbiodinium_sp.	C
18V1V2	Cluster_431	0	0	0	0	3	0	0	0	0	0	0	0	0	0	0	0	Eukaryota	Opisthokonta	Metazoa	Cnidaria	Cnidaria_X	Anthozoa	Pocillopora	Pocillopora_meandrina	-
18V1V2	Cluster_44	0	0	0	0	20	20	0	0	0	0	0	0	0	0	0	0	Eukaryota	Stramenopiles	Ochrophyta	Bacillariophyta	Bacillariophyta_X	Polar-centric-Mediophyceae	Multi-affiliation	Multi-affiliation	-
18V1V2	Cluster_4492	0	0	0	0	0	0	0	0	0	0	0	0	0	5	0	0	Eukaryota	Alveolata	Dinophyta	Dinophyceae	Suessiales	Suessiales_X	Symbiodinium	Symbiodinium_sp.	D
18V1V2	Cluster_45	0	5	3	0	4	3	3	3	3	9	3	6	3	0	0	4	Eukaryota	Alveolata	Dinophyta	Dinophyceae	Suessiales	Suessiales_X	Multi-affiliation	Multi-affiliation	-
18V1V2	Cluster_4977	0	0	0	0	0	0	0	3	0	0	0	0	0	0	0	0	Eukaryota	Alveolata	Dinophyta	Dinophyceae	Suessiales	Suessiales_X	Symbiodinium	Symbiodinium_sp.	C
18V1V2	Cluster_5	19	2012	18	0	0	0	0	0	0	0	7	4056	0	8	3	0	Eukaryota	Opisthokonta	Metazoa	Cnidaria	Cnidaria_X	Anthozoa	Pocillopora	Pocillopora_meandrina	-
18V1V2	Cluster_50	0	0	0	0	0	0	0	0	0	0	0	0	21	0	11	3	Eukaryota	Alveolata	Dinophyta	Dinophyceae	Suessiales	Suessiales_X	Symbiodinium	Symbiodinium_sp.	A
18V1V2	Cluster_51	0	12	0	0	0	0	0	0	0	0	0	12	0	0	0	0	Eukaryota	Opisthokonta	Metazoa	Cnidaria	Cnidaria_X	Anthozoa	Pocillopora	Pocillopora_meandrina	-
18V1V2	Cluster_5161	0	0	0	0	0	4	0	0	0	0	0	0	0	0	0	0	Eukaryota	Alveolata	Dinophyta	Dinophyceae	Suessiales	Suessiales_X	Symbiodinium	Symbiodinium_sp.	C
18V1V2	Cluster_5277	0	0	0	0	0	0	0	0	3	0	0	0	0	0	0	0	Eukaryota	Alveolata	Dinophyta	Dinophyceae	Suessiales	Suessiales_X	Symbiodinium	Symbiodinium_sp.	C
18V1V2	Cluster_5310	0	0	0	3	0	0	0	0	0	0	0	0	0	0	0	0	Eukaryota	Alveolata	Dinophyta	Dinophyceae	Suessiales	Suessiales_X	Symbiodinium	Symbiodinium_sp.	C
18V1V2	Cluster_54	0	0	0	0	0	0	0	0	0	0	0	0	0	18	0	0	Eukaryota	Alveolata	Dinophyta	Dinophyceae	Suessiales	Suessiales_X	Symbiodinium	Symbiodinium_sp.	D
18V1V2	Cluster_55	0	0	0	0	0	0	0	0	0	0	0	0	0	0	0	19	Eukaryota	Stramenopiles	Ochrophyta	Bacillariophyta	Bacillariophyta_X	Raphid-pennate	Multi-affiliation	Multi-affiliation	-
18V1V2	Cluster_57	0	0	0	0	0	0	0	0	0	0	15	0	0	0	0	0	Eukaryota	Archaeplastida	Streptophyta	Embryophyceae	Embryophyceae_X	Embryophyceae_XX	Quercus	Quercus_rubra	-
18V1V2	Cluster_58	14	0	0	0	0	0	0	0	0	0	0	0	0	0	0	0	Eukaryota	Archaeplastida	Streptophyta	Embryophyceae	Embryophyceae_X	Embryophyceae_XX	Stellaria	Stellaria_media	-
18V1V2	Cluster_59	0	0	0	0	0	0	0	0	0	0	19	0	0	0	0	0	Eukaryota	Opisthokonta	Fungi	Basidiomycota	Agaricomycotina	Agaricomycetes	Clitocybe	Clitocybe_nebularis	-
18V1V2	Cluster_6	0	0	0	0	0	0	87	0	0	5044	0	0	0	0	0	0	Eukaryota	Alveolata	Dinophyta	Dinophyceae	Suessiales	Suessiales_X	Symbiodinium	Symbiodinium_sp.	C
18V1V2	Cluster_61	0	0	0	0	0	14	0	0	0	0	0	0	0	0	0	0	Eukaryota	Alveolata	Dinophyta	Dinophyceae	Suessiales	Suessiales_X	Symbiodinium	Symbiodinium_sp.	C
18V1V2	Cluster_62	0	0	0	0	14	0	0	0	0	0	0	0	0	0	0	0	Eukaryota	Alveolata	Ciliophora	Phyllopharyngea	Suctoria	Acinetidae	Acineta	Acineta_tuberosa	-
18V1V2	Cluster_6477	0	0	4	0	0	0	0	0	0	0	0	0	0	0	0	0	Eukaryota	Alveolata	Dinophyta	Dinophyceae	Suessiales	Suessiales_X	Symbiodinium	Symbiodinium_sp.	D
18V1V2	Cluster_66	0	0	0	0	14	0	0	0	0	0	0	0	0	0	0	0	Eukaryota	Alveolata	Ciliophora	Oligohymenophorea	Peritrichia	Zoothamniidae	Zoothamnopsis	Zoothamnopsis_sinica	-
18V1V2	Cluster_67	0	0	0	0	0	0	0	0	0	0	0	0	0	0	0	3	Eukaryota	Opisthokonta	Metazoa	Cnidaria	Cnidaria_X	Anthozoa	Pocillopora	Pocillopora_meandrina	-
18V1V2	Cluster_6737	0	3	0	0	0	0	0	0	0	0	0	0	0	0	0	0	Eukaryota	Alveolata	Dinophyta	Dinophyceae	Suessiales	Suessiales_X	Symbiodinium	Symbiodinium_sp.	D
18V1V2	Cluster_68	0	10	0	0	0	0	0	0	0	0	0	0	0	0	0	0	Eukaryota	Opisthokonta	Metazoa	Cnidaria	Cnidaria_X	Hydrozoa	Hydrozoa_X	Hydrozoa_X_sp.	-
18V1V2	Cluster_6966	0	0	0	0	0	0	0	0	0	0	0	0	0	3	0	0	Eukaryota	Alveolata	Dinophyta	Dinophyceae	Suessiales	Suessiales_X	Symbiodinium	Symbiodinium_sp.	D
18V1V2	Cluster_6998	0	0	0	0	0	0	0	0	0	0	0	0	0	3	0	0	Eukaryota	Alveolata	Dinophyta	Dinophyceae	Suessiales	Suessiales_X	Symbiodinium	Symbiodinium_sp.	D
18V1V2	Cluster_70	0	0	0	0	10	0	0	0	0	0	0	0	0	0	0	0	Eukaryota	Alveolata	Dinophyta	Dinophyceae	Dinophyceae_X	Dinophyceae_XX	Prorocentrum	Prorocentrum_micans	-
18V1V2	Cluster_73	0	0	0	0	0	0	0	0	0	0	0	0	0	4	0	0	Eukaryota	Opisthokonta	Metazoa	Cnidaria	Cnidaria_X	Anthozoa	Pocillopora	Pocillopora_meandrina	-
18V1V2	Cluster_75	0	0	0	3	0	7	0	0	0	0	0	0	0	0	0	0	Eukaryota	Alveolata	Dinophyta	Dinophyceae	Suessiales	Suessiales_X	Symbiodinium	Symbiodinium_sp.	C
18V1V2	Cluster_76	0	0	0	0	12	0	0	0	0	0	0	0	0	0	0	0	Eukaryota	Stramenopiles	Ochrophyta	Bacillariophyta	Bacillariophyta_X	Raphid-pennate	Navicula	Navicula_perminuta	-
18V1V2	Cluster_7654	0	3	0	0	0	0	0	0	0	0	0	0	0	0	0	0	Eukaryota	Alveolata	Dinophyta	Dinophyceae	Suessiales	Suessiales_X	Symbiodinium	Symbiodinium_sp.	D
18V1V2	Cluster_77	0	0	0	0	0	0	0	0	0	0	0	0	9	0	0	0	Eukaryota	Opisthokonta	Metazoa	Cnidaria	Cnidaria_X	Anthozoa	Pocillopora	Pocillopora_meandrina	-
18V1V2	Cluster_78	0	0	0	0	3	0	0	0	0	0	0	0	0	0	0	0	Eukaryota	Alveolata	Ciliophora	Spirotrichea	Choreotrichia	Dictyocystidae	Codonellopsis	Codonellopsis_nipponica	-
18V1V2	Cluster_7800	0	0	0	0	0	0	0	0	0	0	0	0	0	3	0	0	Eukaryota	Alveolata	Dinophyta	Dinophyceae	Suessiales	Suessiales_X	Symbiodinium	Symbiodinium_sp.	D
18V1V2	Cluster_8	0	0	0	4	0	0	1796	1235	0	0	0	0	0	0	0	522	Eukaryota	Alveolata	Ciliophora	Spirotrichea	Licnophoria	Licnophoridae	Licnophora	Licnophora_macfarlandi	-
18V1V2	Cluster_81	0	6	0	0	0	0	0	0	0	0	0	0	0	0	0	0	Eukaryota	Alveolata	Dinophyta	Dinophyceae	Suessiales	Suessiales_X	Symbiodinium	Symbiodinium_sp.	D
18V1V2	Cluster_8127	0	3	0	0	0	0	0	0	0	0	0	0	0	0	0	0	Eukaryota	Alveolata	Dinophyta	Dinophyceae	Suessiales	Suessiales_X	Symbiodinium	Symbiodinium_sp.	D
18V1V2	Cluster_8158	0	5	0	0	0	0	0	0	0	0	0	0	0	0	0	0	Eukaryota	Alveolata	Dinophyta	Dinophyceae	Suessiales	Suessiales_X	Symbiodinium	Symbiodinium_sp.	D
18V1V2	Cluster_8201	0	4	0	0	0	0	0	0	0	0	0	0	0	0	0	0	Eukaryota	Alveolata	Dinophyta	Dinophyceae	Suessiales	Suessiales_X	Symbiodinium	Symbiodinium_sp.	D
18V1V2	Cluster_8213	0	0	4	0	0	0	0	0	0	0	0	0	0	0	0	0	Eukaryota	Alveolata	Dinophyta	Dinophyceae	Suessiales	Suessiales_X	Symbiodinium	Symbiodinium_sp.	D
18V1V2	Cluster_8296	0	3	0	0	0	0	0	0	0	0	0	0	0	0	0	0	Eukaryota	Alveolata	Dinophyta	Dinophyceae	Suessiales	Suessiales_X	Symbiodinium	Symbiodinium_sp.	D
18V1V2	Cluster_83	0	0	0	0	0	0	0	0	0	0	0	0	0	0	7	0	Eukaryota	Opisthokonta	Metazoa	Cnidaria	Cnidaria_X	Hydrozoa	Geryonia	Geryonia_proboscidalis	-
18V1V2	Cluster_84	0	0	0	0	0	0	0	0	0	0	0	0	0	0	0	4	Eukaryota	Alveolata	Dinophyta	Syndiniales	Dino-Group-I	Dino-Group-I-Clade-1	Dino-Group-I-Clade-1_X	Dino-Group-I-Clade-1_X_sp.	-
18V1V2	Cluster_8579	0	3	0	0	0	0	0	0	0	0	0	0	0	0	0	0	Eukaryota	Alveolata	Dinophyta	Dinophyceae	Suessiales	Suessiales_X	Symbiodinium	Symbiodinium_sp.	D
18V1V2	Cluster_86	0	8	0	0	0	0	0	0	0	0	0	0	0	0	0	0	Eukaryota	Opisthokonta	Fungi	Basidiomycota	Agaricomycotina	Agaricomycetes	Rogersella	Rogersella_griseliniae	-
18V1V2	Cluster_87	0	0	0	0	0	0	0	0	0	0	0	0	0	3	0	0	Eukaryota	Alveolata	Dinophyta	Dinophyceae	Suessiales	Suessiales_X	Symbiodinium	Symbiodinium_sp.	D
18V1V2	Cluster_89	0	0	0	0	0	0	0	0	0	0	5	0	0	0	0	0	Eukaryota	Opisthokonta	Fungi	Basidiomycota	Agaricomycotina	Agaricomycetes	Agaricomycetes_X	Agaricomycetes_X_sp.	-
18V1V2	Cluster_9	6	339	413	0	0	0	0	0	0	0	333	138	8	1597	0	32	Eukaryota	Alveolata	Dinophyta	Dinophyceae	Suessiales	Suessiales_X	Symbiodinium	Symbiodinium_sp.	D
18V1V2	Cluster_90	0	0	0	0	0	0	0	0	0	0	0	6	0	0	0	0	Eukaryota	Opisthokonta	Metazoa	Cnidaria	Cnidaria_X	Anthozoa	Pocillopora	Pocillopora_meandrina	-
18V1V2	Cluster_93	0	0	0	0	5	0	0	0	0	0	0	0	0	0	0	0	Eukaryota	Rhizaria	Cercozoa	Filosa-Thecofilosea	Cryomonadida	Protaspa-lineage	Protaspa	Protaspa_longipes	-
18V1V2	Cluster_96	0	3	0	0	0	0	0	0	0	0	0	3	0	0	0	0	Eukaryota	Opisthokonta	Metazoa	Cnidaria	Cnidaria_X	Anthozoa	Pocillopora	Pocillopora_meandrina	-
18V1V2	Cluster_97	0	0	0	0	0	0	0	0	0	0	0	0	0	3	0	0	Eukaryota	Opisthokonta	Metazoa	Cnidaria	Cnidaria_X	Anthozoa	Pocillopora	Pocillopora_meandrina	-
18V1V2	Cluster_99	0	0	0	0	0	0	0	0	0	6	0	0	0	0	0	0	Eukaryota	Alveolata	Dinophyta	Dinophyceae	Suessiales	Suessiales_X	Symbiodinium	Symbiodinium_sp.	C
18SV4	Cluster_1	8940	1210	641	34237	41092	40419	30917	34048	32694	25009	2204	8704	7716	1893	6774	26466	Eukaryota	Opisthokonta	Metazoa	Cnidaria	Cnidaria_X	Anthozoa	Pocillopora	Pocillopora_meandrina	-
18SV4	Cluster_10	0	0	5	0	0	0	0	0	0	0	0	0	484	0	132	35	Eukaryota	Alveolata	Dinophyta	Dinophyceae	Suessiales	Suessiales_X	Symbiodinium	Multi-affiliation	A
18SV4	Cluster_100	0	0	0	0	0	0	0	5	0	0	0	0	0	0	0	0	Eukaryota	Alveolata	Dinophyta	Dinophyceae	Suessiales	Suessiales_X	Symbiodinium	Symbiodinium_sp.	C
18SV4	Cluster_1000	0	0	0	0	0	0	0	0	0	3	0	0	0	0	0	0	Eukaryota	Alveolata	Dinophyta	Dinophyceae	Suessiales	Suessiales_X	Symbiodinium	Symbiodinium_sp.	C
18SV4	Cluster_1001	0	0	0	0	0	0	0	0	0	3	0	0	0	0	0	0	Eukaryota	Alveolata	Dinophyta	Dinophyceae	Suessiales	Suessiales_X	Symbiodinium	Symbiodinium_sp.	C
18SV4	Cluster_101	0	0	0	0	0	0	0	0	0	4	0	0	0	0	0	0	Eukaryota	Alveolata	Dinophyta	Dinophyceae	Suessiales	Suessiales_X	Symbiodinium	Symbiodinium_sp.	C
18SV4	Cluster_102	0	0	0	0	0	0	0	0	0	4	0	0	0	0	0	0	Eukaryota	Alveolata	Dinophyta	Dinophyceae	Suessiales	Suessiales_X	Symbiodinium	Symbiodinium_sp.	D
18SV4	Cluster_105	0	0	0	0	0	0	0	0	0	0	0	0	0	0	0	6	Eukaryota	Alveolata	Dinophyta	Dinophyceae	Suessiales	Suessiales_X	Symbiodinium	Multi-affiliation	A
18SV4	Cluster_106	4	0	0	0	0	0	0	0	0	0	0	0	0	0	0	0	Eukaryota	Alveolata	Dinophyta	Dinophyceae	Suessiales	Suessiales_X	Symbiodinium	Symbiodinium_sp.	unknown
18SV4	Cluster_107	0	0	0	0	0	0	0	0	0	13	0	0	0	0	0	0	Eukaryota	Alveolata	Dinophyta	Dinophyceae	Suessiales	Suessiales_X	Symbiodinium	Symbiodinium_sp.	C
18SV4	Cluster_108	0	0	0	0	3	0	0	0	0	0	0	0	0	0	0	0	Eukaryota	Alveolata	Dinophyta	Dinophyceae	Suessiales	Suessiales_X	Symbiodinium	Symbiodinium_sp.	C
18SV4	Cluster_109	0	0	0	0	0	0	0	0	0	5	0	0	0	0	0	0	Eukaryota	Alveolata	Dinophyta	Dinophyceae	Suessiales	Suessiales_X	Symbiodinium	Symbiodinium_sp.	D
18SV4	Cluster_10937	0	0	0	0	0	0	3	0	0	0	0	0	0	0	0	0	Eukaryota	Opisthokonta	Metazoa	Cnidaria	Cnidaria_X	Anthozoa	Pocillopora	Pocillopora_meandrina	-
18SV4	Cluster_11	0	0	0	0	0	0	0	0	0	0	0	0	577	0	0	0	Eukaryota	Alveolata	Dinophyta	Dinophyceae	Suessiales	Suessiales_X	Symbiodinium	Multi-affiliation	A
18SV4	Cluster_110	0	0	0	4	3	0	0	0	0	0	0	0	0	0	0	0	Eukaryota	Opisthokonta	Metazoa	Cnidaria	Cnidaria_X	Anthozoa	Pocillopora	Pocillopora_meandrina	-
18SV4	Cluster_111	0	0	0	0	0	0	0	0	0	4	0	0	0	0	0	0	Eukaryota	Alveolata	Dinophyta	Dinophyceae	Suessiales	Suessiales_X	Symbiodinium	Symbiodinium_sp.	C
18SV4	Cluster_112	0	0	0	0	0	0	5	0	0	0	0	0	0	0	0	0	Eukaryota	Alveolata	Dinophyta	Dinophyceae	Suessiales	Suessiales_X	Symbiodinium	Multi-affiliation	D
18SV4	Cluster_113	0	0	0	0	0	0	3	0	0	0	0	0	0	0	0	0	Eukaryota	Alveolata	Dinophyta	Dinophyceae	Suessiales	Suessiales_X	Symbiodinium	Symbiodinium_sp.	C
18SV4	Cluster_114	0	0	0	0	0	3	0	0	0	0	0	0	0	0	0	0	Eukaryota	Alveolata	Dinophyta	Dinophyceae	Suessiales	Suessiales_X	Woloszynskia	Woloszynskia_sp._strain1	-
18SV4	Cluster_116	0	0	0	0	0	0	0	0	3	0	0	0	0	0	0	0	Eukaryota	Alveolata	Dinophyta	Dinophyceae	Suessiales	Suessiales_X	Symbiodinium	Symbiodinium_sp.	C
18SV4	Cluster_119	0	0	0	0	0	0	3	0	0	0	0	0	0	0	0	0	Eukaryota	Alveolata	Dinophyta	Dinophyceae	Suessiales	Suessiales_X	Symbiodinium	Multi-affiliation	unknown
18SV4	Cluster_12	0	0	0	0	0	0	39	0	0	501	0	0	0	0	0	0	Eukaryota	Alveolata	Dinophyta	Dinophyceae	Suessiales	Suessiales_X	Symbiodinium	Symbiodinium_sp.	C
18SV4	Cluster_120	0	0	0	0	0	3	0	0	0	0	0	0	0	0	0	0	Eukaryota	Opisthokonta	Metazoa	Cnidaria	Cnidaria_X	Anthozoa	Pocillopora	Pocillopora_meandrina	-
18SV4	Cluster_121	0	0	0	0	0	0	3	0	0	0	0	0	0	0	0	0	Eukaryota	Opisthokonta	Metazoa	Cnidaria	Cnidaria_X	Anthozoa	Pocillopora	Pocillopora_meandrina	-
18SV4	Cluster_122	0	0	0	0	0	0	0	0	0	0	0	0	0	0	0	3	Eukaryota	Opisthokonta	Metazoa	Cnidaria	Cnidaria_X	Anthozoa	Pocillopora	Pocillopora_meandrina	-
18SV4	Cluster_123	0	0	0	0	0	3	0	0	0	0	0	0	0	0	0	0	Eukaryota	Opisthokonta	Metazoa	Cnidaria	Cnidaria_X	Anthozoa	Pocillopora	Pocillopora_meandrina	-
18SV4	Cluster_124	0	0	0	0	3	0	0	0	0	0	0	0	0	0	0	0	Eukaryota	Opisthokonta	Metazoa	Cnidaria	Cnidaria_X	Anthozoa	Pocillopora	Pocillopora_meandrina	-
18SV4	Cluster_125	0	0	0	0	0	0	0	3	0	0	0	0	0	0	0	0	Eukaryota	Opisthokonta	Metazoa	Cnidaria	Cnidaria_X	Anthozoa	Pocillopora	Pocillopora_meandrina	-
18SV4	Cluster_126	3	0	0	0	0	0	0	0	0	0	0	0	0	0	0	0	Eukaryota	Opisthokonta	Metazoa	Cnidaria	Cnidaria_X	Anthozoa	Pocillopora	Pocillopora_meandrina	-
18SV4	Cluster_127	0	0	0	0	0	0	0	0	3	0	0	0	0	0	0	0	Eukaryota	Opisthokonta	Metazoa	Cnidaria	Cnidaria_X	Anthozoa	Pocillopora	Pocillopora_meandrina	-
18SV4	Cluster_128	0	0	0	0	0	0	0	0	0	0	0	0	3	0	0	0	Eukaryota	Alveolata	Dinophyta	Dinophyceae	Suessiales	Suessiales_X	Symbiodinium	Multi-affiliation	A
18SV4	Cluster_129	0	0	0	3	0	0	0	0	0	0	0	0	0	0	0	0	Eukaryota	Alveolata	Dinophyta	Dinophyceae	Suessiales	Suessiales_X	Symbiodinium	Symbiodinium_sp.	C
18SV4	Cluster_130	0	0	0	0	0	0	0	0	0	0	0	0	0	0	0	3	Eukaryota	Alveolata	Dinophyta	Dinophyceae	Suessiales	Suessiales_X	Symbiodinium	Multi-affiliation	A
18SV4	Cluster_131	0	0	0	0	0	0	0	0	0	0	0	0	0	0	0	4	Eukaryota	Alveolata	Dinophyta	Dinophyceae	Suessiales	Suessiales_X	Symbiodinium	Symbiodinium_sp.	unknown
18SV4	Cluster_133	0	0	0	0	0	0	0	0	0	0	0	0	0	0	3	0	Eukaryota	Alveolata	Dinophyta	Dinophyceae	Suessiales	Suessiales_X	Symbiodinium	Multi-affiliation	A
18SV4	Cluster_134	0	0	0	0	3	0	0	0	0	0	0	0	0	0	0	0	Eukaryota	Alveolata	Dinophyta	Dinophyceae	Suessiales	Suessiales_X	Symbiodinium	Symbiodinium_sp.	C
18SV4	Cluster_135	0	0	0	0	0	0	3	0	0	0	0	0	0	0	0	0	Eukaryota	Alveolata	Dinophyta	Dinophyceae	Suessiales	Suessiales_X	Symbiodinium	Symbiodinium_sp.	C
18SV4	Cluster_136	0	0	0	0	0	0	0	0	0	4	0	0	0	0	0	0	Eukaryota	Alveolata	Dinophyta	Dinophyceae	Suessiales	Suessiales_X	Symbiodinium	Symbiodinium_sp.	C
18SV4	Cluster_137	0	0	0	0	0	0	0	0	0	6	0	0	0	0	0	0	Eukaryota	Alveolata	Dinophyta	Dinophyceae	Suessiales	Suessiales_X	Symbiodinium	Symbiodinium_sp.	C
18SV4	Cluster_138	0	3	0	0	0	0	0	0	0	0	0	0	0	0	0	0	Eukaryota	Alveolata	Dinophyta	Dinophyceae	Suessiales	Suessiales_X	Symbiodinium	Symbiodinium_sp.	unknown
18SV4	Cluster_139	0	0	0	0	0	0	0	0	0	0	0	3	0	0	0	0	Eukaryota	Alveolata	Dinophyta	Dinophyceae	Suessiales	Suessiales_X	Symbiodinium	Symbiodinium_sp.	unknown
18SV4	Cluster_14	0	0	0	26	15	49	3	10	0	239	0	0	0	0	0	0	Eukaryota	Alveolata	Dinophyta	Dinophyceae	Suessiales	Suessiales_X	Symbiodinium	Symbiodinium_sp.	D
18SV4	Cluster_140	0	0	0	0	0	0	0	0	0	0	0	0	0	0	0	3	Eukaryota	Alveolata	Dinophyta	Dinophyceae	Suessiales	Suessiales_X	Symbiodinium	Symbiodinium_sp.	unknown
18SV4	Cluster_141	0	0	0	0	0	0	0	0	0	5	0	0	0	0	0	0	Eukaryota	Alveolata	Dinophyta	Dinophyceae	Suessiales	Suessiales_X	Symbiodinium	Symbiodinium_sp.	C
18SV4	Cluster_142	0	0	0	0	0	0	0	0	0	3	0	0	0	0	0	0	Eukaryota	Alveolata	Dinophyta	Dinophyceae	Suessiales	Suessiales_X	Symbiodinium	Symbiodinium_sp.	C
18SV4	Cluster_143	0	0	0	0	0	0	0	0	0	17	0	0	0	0	0	0	Eukaryota	Alveolata	Dinophyta	Dinophyceae	Suessiales	Suessiales_X	Symbiodinium	Symbiodinium_sp.	C
18SV4	Cluster_144	0	0	0	0	0	0	0	0	0	4	0	0	0	0	0	0	Eukaryota	Alveolata	Dinophyta	Dinophyceae	Suessiales	Suessiales_X	Symbiodinium	Symbiodinium_sp.	C
18SV4	Cluster_145	0	0	0	0	0	0	0	0	0	3	0	0	0	0	0	0	Eukaryota	Alveolata	Dinophyta	Dinophyceae	Suessiales	Suessiales_X	Symbiodinium	Symbiodinium_sp.	C
18SV4	Cluster_146	0	0	0	0	0	0	0	0	0	3	0	0	0	0	0	0	Eukaryota	Alveolata	Dinophyta	Dinophyceae	Suessiales	Suessiales_X	Symbiodinium	Symbiodinium_sp.	C
18SV4	Cluster_147	0	0	0	0	0	0	0	0	0	0	0	0	0	0	3	3	Eukaryota	Alveolata	Dinophyta	Dinophyceae	Suessiales	Suessiales_X	Symbiodinium	Multi-affiliation	A
18SV4	Cluster_148	0	0	0	0	0	0	0	0	0	0	0	0	3	0	0	0	Eukaryota	Alveolata	Dinophyta	Dinophyceae	Suessiales	Suessiales_X	Symbiodinium	Multi-affiliation	A
18SV4	Cluster_149	0	0	0	0	0	0	0	0	0	0	0	0	3	0	0	0	Eukaryota	Alveolata	Dinophyta	Dinophyceae	Suessiales	Suessiales_X	Symbiodinium	Symbiodinium_sp.	A
18SV4	Cluster_15	0	0	0	0	0	0	0	0	0	0	3	104	107	3	7	107	Eukaryota	Alveolata	Dinophyta	Syndiniales	Dino-Group-I	Dino-Group-I-Clade-1	Dino-Group-I-Clade-1_X	Dino-Group-I-Clade-1_X_sp.	-
18SV4	Cluster_150	0	0	0	0	0	0	0	0	0	0	0	0	3	0	0	0	Eukaryota	Alveolata	Dinophyta	Dinophyceae	Suessiales	Suessiales_X	Symbiodinium	Multi-affiliation	A
18SV4	Cluster_151	0	0	0	0	0	0	0	0	0	0	0	0	3	0	0	0	Eukaryota	Alveolata	Dinophyta	Dinophyceae	Suessiales	Suessiales_X	Symbiodinium	Multi-affiliation	A
18SV4	Cluster_152	0	0	0	0	0	0	0	0	0	0	0	0	3	0	0	0	Eukaryota	Alveolata	Dinophyta	Dinophyceae	Suessiales	Suessiales_X	Symbiodinium	Multi-affiliation	A
18SV4	Cluster_153	0	0	0	0	0	0	0	0	0	3	0	0	0	0	0	0	Eukaryota	Alveolata	Dinophyta	Dinophyceae	Suessiales	Suessiales_X	Symbiodinium	Multi-affiliation	D
18SV4	Cluster_154	0	0	0	0	0	0	0	0	0	0	0	0	3	0	0	0	Eukaryota	Alveolata	Dinophyta	Dinophyceae	Suessiales	Suessiales_X	Symbiodinium	Multi-affiliation	A
18SV4	Cluster_155	0	0	0	0	0	0	0	0	3	0	0	0	0	0	0	0	Eukaryota	Alveolata	Dinophyta	Dinophyceae	Suessiales	Suessiales_X	Symbiodinium	Multi-affiliation	D
18SV4	Cluster_156	0	0	0	0	0	0	3	0	0	0	0	0	0	0	0	0	Eukaryota	Alveolata	Dinophyta	Dinophyceae	Suessiales	Suessiales_X	Symbiodinium	Multi-affiliation	D
18SV4	Cluster_157	0	0	0	0	0	0	0	0	5	0	0	0	0	0	0	0	Eukaryota	Alveolata	Dinophyta	Dinophyceae	Suessiales	Suessiales_X	Symbiodinium	Symbiodinium_sp.	C
18SV4	Cluster_158	0	0	0	0	0	0	0	0	0	6	0	0	0	0	0	0	Eukaryota	Alveolata	Dinophyta	Dinophyceae	Suessiales	Suessiales_X	Symbiodinium	Symbiodinium_sp.	C
18SV4	Cluster_159	0	0	0	0	0	0	0	3	0	0	0	0	0	0	0	0	Eukaryota	Alveolata	Dinophyta	Dinophyceae	Suessiales	Suessiales_X	Symbiodinium	Multi-affiliation	D
18SV4	Cluster_16	0	0	0	0	0	0	0	68	236	0	0	0	0	0	0	0	Eukaryota	Alveolata	Dinophyta	Dinophyceae	Suessiales	Suessiales_X	Symbiodinium	Symbiodinium_sp.	C
18SV4	Cluster_160	0	0	0	0	0	0	0	0	0	3	0	0	0	0	0	0	Eukaryota	Alveolata	Dinophyta	Dinophyceae	Suessiales	Suessiales_X	Symbiodinium	Multi-affiliation	D
18SV4	Cluster_161	0	0	0	0	0	0	0	0	0	4	0	0	0	0	0	0	Eukaryota	Alveolata	Dinophyta	Dinophyceae	Suessiales	Suessiales_X	Symbiodinium	Symbiodinium_sp.	C
18SV4	Cluster_162	0	0	0	0	0	0	0	0	0	0	0	0	0	0	0	3	Eukaryota	Alveolata	Dinophyta	Dinophyceae	Suessiales	Suessiales_X	Symbiodinium	Multi-affiliation	A
18SV4	Cluster_163	0	0	0	0	0	0	0	0	0	3	0	0	0	0	0	0	Eukaryota	Alveolata	Dinophyta	Dinophyceae	Suessiales	Suessiales_X	Symbiodinium	Symbiodinium_sp.	C
18SV4	Cluster_164	0	0	0	0	0	0	0	0	0	3	0	0	0	0	0	0	Eukaryota	Alveolata	Dinophyta	Dinophyceae	Suessiales	Suessiales_X	Symbiodinium	Symbiodinium_sp.	C
18SV4	Cluster_165	3	0	0	0	0	0	0	0	0	0	0	0	0	0	0	0	Eukaryota	Alveolata	Dinophyta	Dinophyceae	Suessiales	Suessiales_X	Symbiodinium	Symbiodinium_sp.	unknown
18SV4	Cluster_166	0	0	0	0	0	0	0	0	0	0	3	0	0	0	0	0	Eukaryota	Alveolata	Dinophyta	Dinophyceae	Suessiales	Suessiales_X	Symbiodinium	Symbiodinium_sp.	unknown
18SV4	Cluster_167	0	0	0	0	0	0	0	0	3	0	0	0	0	0	0	0	Eukaryota	Alveolata	Dinophyta	Dinophyceae	Suessiales	Suessiales_X	Symbiodinium	Symbiodinium_sp.	C
18SV4	Cluster_168	0	0	0	0	0	0	0	0	0	3	0	0	0	0	0	0	Eukaryota	Alveolata	Dinophyta	Dinophyceae	Suessiales	Suessiales_X	Symbiodinium	Symbiodinium_sp.	C
18SV4	Cluster_169	0	0	0	0	0	0	0	0	0	0	0	0	0	0	0	4	Eukaryota	Alveolata	Dinophyta	Dinophyceae	Suessiales	Suessiales_X	Symbiodinium	Multi-affiliation	A
18SV4	Cluster_170	0	0	0	0	0	0	3	0	0	0	0	0	0	0	0	0	Eukaryota	Alveolata	Dinophyta	Dinophyceae	Suessiales	Suessiales_X	Symbiodinium	Symbiodinium_sp.	C
18SV4	Cluster_171	0	0	0	0	0	0	0	0	0	3	0	0	0	0	0	0	Eukaryota	Alveolata	Dinophyta	Dinophyceae	Suessiales	Suessiales_X	Symbiodinium	Symbiodinium_sp.	C
18SV4	Cluster_173	0	0	0	0	0	3	0	0	0	0	0	0	0	0	0	0	Eukaryota	Opisthokonta	Metazoa	Cnidaria	Cnidaria_X	Anthozoa	Pocillopora	Pocillopora_meandrina	-
18SV4	Cluster_174	0	0	0	0	0	0	0	0	0	3	0	0	0	0	0	0	Eukaryota	Opisthokonta	Metazoa	Cnidaria	Cnidaria_X	Anthozoa	Pocillopora	Pocillopora_meandrina	-
18SV4	Cluster_175	0	0	0	0	0	0	0	0	0	0	0	0	3	0	0	0	Eukaryota	Opisthokonta	Metazoa	Cnidaria	Cnidaria_X	Anthozoa	Pocillopora	Pocillopora_meandrina	-
18SV4	Cluster_176	0	0	0	0	0	0	0	3	0	0	0	0	0	0	0	0	Eukaryota	Opisthokonta	Metazoa	Cnidaria	Cnidaria_X	Anthozoa	Pocillopora	Pocillopora_meandrina	-
18SV4	Cluster_177	0	0	0	0	0	0	0	0	3	0	0	0	0	0	0	0	Eukaryota	Opisthokonta	Metazoa	Cnidaria	Cnidaria_X	Anthozoa	Pocillopora	Pocillopora_meandrina	-
18SV4	Cluster_178	0	0	0	0	0	0	0	0	0	3	0	0	0	0	0	0	Eukaryota	Opisthokonta	Metazoa	Cnidaria	Cnidaria_X	Anthozoa	Pocillopora	Pocillopora_meandrina	-
18SV4	Cluster_179	0	0	0	0	0	0	0	0	0	0	0	0	0	0	3	0	Eukaryota	Opisthokonta	Metazoa	Cnidaria	Cnidaria_X	Anthozoa	Pocillopora	Pocillopora_meandrina	-
18SV4	Cluster_18	0	0	0	3	195	78	0	0	0	0	0	0	0	0	0	0	Eukaryota	Alveolata	Dinophyta	Dinophyceae	Suessiales	Suessiales_X	Symbiodinium	Symbiodinium_sp.	C
18SV4	Cluster_180	0	0	0	0	0	0	0	0	3	0	0	0	0	0	0	0	Eukaryota	Opisthokonta	Metazoa	Cnidaria	Cnidaria_X	Anthozoa	Pocillopora	Pocillopora_meandrina	-
18SV4	Cluster_182	0	0	0	0	0	0	4	0	0	0	0	0	0	0	0	0	Eukaryota	Alveolata	Dinophyta	Dinophyceae	Suessiales	Suessiales_X	Symbiodinium	Symbiodinium_sp.	C
18SV4	Cluster_183	0	0	0	0	0	0	0	3	0	0	0	0	0	0	0	0	Eukaryota	Opisthokonta	Metazoa	Cnidaria	Cnidaria_X	Anthozoa	Pocillopora	Pocillopora_meandrina	-
18SV4	Cluster_184	0	0	0	0	0	0	0	0	0	0	0	0	0	0	0	3	Eukaryota	Alveolata	Dinophyta	Dinophyceae	Suessiales	Suessiales_X	Symbiodinium	Symbiodinium_sp.	unknown
18SV4	Cluster_185	0	0	0	0	0	0	0	0	0	0	0	0	0	0	3	0	Eukaryota	Alveolata	Dinophyta	Dinophyceae	Suessiales	Suessiales_X	Symbiodinium	Multi-affiliation	A
18SV4	Cluster_186	0	0	0	0	0	0	0	0	0	0	0	0	0	0	0	4	Eukaryota	Alveolata	Dinophyta	Syndiniales	Dino-Group-I	Dino-Group-I-Clade-4	Dino-Group-I-Clade-4_X	Dino-Group-I-Clade-4_X_sp.	-
18SV4	Cluster_188	0	0	0	0	0	0	0	0	0	3	0	0	0	0	0	0	Eukaryota	Alveolata	Dinophyta	Dinophyceae	Suessiales	Suessiales_X	Symbiodinium	Symbiodinium_sp.	C
18SV4	Cluster_189	3	0	0	0	0	0	0	0	0	0	0	0	0	0	0	0	Eukaryota	Alveolata	Dinophyta	Dinophyceae	Suessiales	Suessiales_X	Symbiodinium	Symbiodinium_sp.	unknown
18SV4	Cluster_19	0	0	0	0	0	0	0	0	0	249	0	0	0	0	0	0	Eukaryota	Alveolata	Dinophyta	Dinophyceae	Suessiales	Suessiales_X	Symbiodinium	Symbiodinium_sp.	C
18SV4	Cluster_190	0	0	0	0	0	0	0	0	0	0	0	0	0	3	0	0	Eukaryota	Alveolata	Dinophyta	Dinophyceae	Suessiales	Suessiales_X	Symbiodinium	Symbiodinium_sp.	unknown
18SV4	Cluster_191	3	0	0	0	0	0	0	0	0	0	0	0	0	0	0	0	Eukaryota	Alveolata	Dinophyta	Dinophyceae	Suessiales	Suessiales_X	Symbiodinium	Symbiodinium_sp.	unknown
18SV4	Cluster_192	0	0	0	0	0	0	0	0	0	0	0	0	0	3	0	0	Eukaryota	Alveolata	Dinophyta	Dinophyceae	Suessiales	Suessiales_X	Symbiodinium	Symbiodinium_sp.	unknown
18SV4	Cluster_193	0	0	0	0	0	0	0	0	0	5	0	0	0	0	0	0	Eukaryota	Alveolata	Dinophyta	Dinophyceae	Suessiales	Suessiales_X	Symbiodinium	Symbiodinium_sp.	C
18SV4	Cluster_194	0	0	0	0	0	0	0	0	0	0	0	0	0	0	3	0	Eukaryota	Alveolata	Dinophyta	Dinophyceae	Suessiales	Suessiales_X	Symbiodinium	Multi-affiliation	A
18SV4	Cluster_195	0	0	0	0	0	0	0	0	0	3	0	0	0	0	0	0	Eukaryota	Alveolata	Dinophyta	Dinophyceae	Suessiales	Suessiales_X	Symbiodinium	Symbiodinium_sp.	C
18SV4	Cluster_196	0	0	0	0	0	0	3	0	0	0	0	0	0	0	0	0	Eukaryota	Alveolata	Dinophyta	Dinophyceae	Suessiales	Suessiales_X	Symbiodinium	Symbiodinium_sp.	C
18SV4	Cluster_197	0	0	0	0	0	0	3	0	0	0	0	0	0	0	0	0	Eukaryota	Alveolata	Dinophyta	Dinophyceae	Suessiales	Suessiales_X	Symbiodinium	Symbiodinium_sp.	C
18SV4	Cluster_198	0	0	0	0	0	0	3	0	0	0	0	0	0	0	0	0	Eukaryota	Alveolata	Dinophyta	Dinophyceae	Suessiales	Suessiales_X	Symbiodinium	Symbiodinium_sp.	C
18SV4	Cluster_199	0	0	0	0	0	0	0	0	0	3	0	0	0	0	0	0	Eukaryota	Alveolata	Dinophyta	Dinophyceae	Suessiales	Suessiales_X	Symbiodinium	Symbiodinium_sp.	C
18SV4	Cluster_2	145	180	68	19631	20364	23450	14744	19309	24121	33787	123	151	6	129	5	74	Eukaryota	Alveolata	Dinophyta	Dinophyceae	Suessiales	Suessiales_X	Symbiodinium	Symbiodinium_sp.	C
18SV4	Cluster_200	0	0	0	0	0	0	0	0	0	3	0	0	0	0	0	0	Eukaryota	Alveolata	Dinophyta	Dinophyceae	Suessiales	Suessiales_X	Symbiodinium	Symbiodinium_sp.	C
18SV4	Cluster_202	0	0	0	0	0	0	0	0	0	4	0	0	0	0	0	0	Eukaryota	Alveolata	Dinophyta	Dinophyceae	Suessiales	Suessiales_X	Symbiodinium	Symbiodinium_sp.	C
18SV4	Cluster_203	0	0	0	0	0	0	0	0	0	0	0	0	0	0	0	4	Eukaryota	Alveolata	Dinophyta	Dinophyceae	Suessiales	Suessiales_X	Symbiodinium	Multi-affiliation	A
18SV4	Cluster_204	0	0	0	0	0	0	0	0	0	0	0	0	0	0	0	4	Eukaryota	Alveolata	Dinophyta	Dinophyceae	Suessiales	Suessiales_X	Symbiodinium	Multi-affiliation	A
18SV4	Cluster_205	0	0	0	0	0	0	0	0	0	0	0	0	0	0	0	4	Eukaryota	Alveolata	Dinophyta	Dinophyceae	Suessiales	Suessiales_X	Symbiodinium	Multi-affiliation	A
18SV4	Cluster_206	0	0	0	0	0	0	0	0	0	0	0	0	0	0	3	0	Eukaryota	Alveolata	Dinophyta	Dinophyceae	Suessiales	Suessiales_X	Symbiodinium	Multi-affiliation	A
18SV4	Cluster_208	0	0	0	0	0	0	0	0	3	0	0	0	0	0	0	0	Eukaryota	Alveolata	Dinophyta	Dinophyceae	Suessiales	Suessiales_X	Symbiodinium	Symbiodinium_sp.	C
18SV4	Cluster_209	0	0	0	0	0	0	0	0	0	0	0	0	3	0	0	0	Eukaryota	Alveolata	Dinophyta	Dinophyceae	Suessiales	Suessiales_X	Symbiodinium	Multi-affiliation	A
18SV4	Cluster_21	0	6	3	0	0	0	0	23	89	0	0	28	0	16	4	7	Eukaryota	Alveolata	Apicomplexa	Apicomplexa_X	Coccidia	Coccidia_X	Coccidia_XX	Coccidia_XX_sp.	-
18SV4	Cluster_210	0	0	0	0	0	0	0	0	0	3	0	0	0	0	0	0	Eukaryota	Alveolata	Dinophyta	Dinophyceae	Suessiales	Suessiales_X	Symbiodinium	Multi-affiliation	D
18SV4	Cluster_211	0	0	3	0	0	0	0	0	0	0	0	0	0	0	0	0	Eukaryota	Alveolata	Dinophyta	Dinophyceae	Suessiales	Suessiales_X	Symbiodinium	Symbiodinium_sp.	unknown
18SV4	Cluster_212	0	0	0	0	0	3	0	0	0	0	0	0	0	0	0	0	Eukaryota	Alveolata	Dinophyta	Dinophyceae	Suessiales	Suessiales_X	Symbiodinium	Symbiodinium_sp.	C
18SV4	Cluster_213	0	0	0	0	0	3	0	0	0	0	0	0	0	0	0	0	Eukaryota	Alveolata	Dinophyta	Dinophyceae	Suessiales	Suessiales_X	Symbiodinium	Symbiodinium_sp.	C
18SV4	Cluster_214	0	0	0	0	0	0	0	0	0	0	0	3	0	0	0	0	Eukaryota	Alveolata	Dinophyta	Dinophyceae	Suessiales	Suessiales_X	Symbiodinium	Symbiodinium_sp.	B
18SV4	Cluster_215	0	0	0	0	0	0	0	0	0	0	0	0	0	3	0	0	Eukaryota	Alveolata	Dinophyta	Dinophyceae	Suessiales	Suessiales_X	Symbiodinium	Symbiodinium_sp.	unknown
18SV4	Cluster_216	0	0	0	0	0	0	0	0	0	0	0	0	0	0	0	3	Eukaryota	Alveolata	Dinophyta	Dinophyceae	Suessiales	Suessiales_X	Symbiodinium	Symbiodinium_sp.	unknown
18SV4	Cluster_217	0	0	0	0	0	0	0	0	0	0	3	0	0	0	0	0	Eukaryota	Alveolata	Dinophyta	Dinophyceae	Suessiales	Suessiales_X	Symbiodinium	Symbiodinium_sp.	unknown
18SV4	Cluster_218	0	0	0	0	0	3	0	0	0	0	0	0	0	0	0	0	Eukaryota	Alveolata	Dinophyta	Dinophyceae	Suessiales	Suessiales_X	Symbiodinium	Multi-affiliation	D
18SV4	Cluster_219	0	0	0	0	0	0	0	0	0	0	0	0	0	0	4	0	Eukaryota	Alveolata	Dinophyta	Dinophyceae	Suessiales	Suessiales_X	Symbiodinium	Multi-affiliation	unknown
18SV4	Cluster_22	10	0	0	0	0	0	0	0	0	0	0	0	0	176	0	0	Eukaryota	Alveolata	Dinophyta	Dinophyceae	Suessiales	Suessiales_X	Symbiodinium	Symbiodinium_sp.	unknown
18SV4	Cluster_220	0	3	0	0	0	0	0	0	0	0	0	0	0	0	0	0	Eukaryota	Alveolata	Dinophyta	Dinophyceae	Suessiales	Suessiales_X	Symbiodinium	Symbiodinium_sp.	unknown
18SV4	Cluster_221	0	0	0	0	0	0	0	0	0	3	0	0	0	0	0	0	Eukaryota	Alveolata	Dinophyta	Dinophyceae	Suessiales	Suessiales_X	Symbiodinium	Symbiodinium_sp.	C
18SV4	Cluster_222	0	0	0	0	0	0	0	0	0	3	0	0	0	0	0	0	Eukaryota	Alveolata	Dinophyta	Dinophyceae	Suessiales	Suessiales_X	Symbiodinium	Symbiodinium_sp.	C
18SV4	Cluster_223	0	0	0	3	0	0	0	0	0	0	0	0	0	0	0	0	Eukaryota	Alveolata	Dinophyta	Dinophyceae	Suessiales	Suessiales_X	Symbiodinium	Symbiodinium_sp.	C
18SV4	Cluster_224	0	0	0	0	0	0	3	0	0	0	0	0	0	0	0	0	Eukaryota	Alveolata	Dinophyta	Dinophyceae	Suessiales	Suessiales_X	Symbiodinium	Multi-affiliation	D
18SV4	Cluster_225	0	0	0	0	0	3	0	0	0	0	0	0	0	0	0	0	Eukaryota	Opisthokonta	Metazoa	Cnidaria	Cnidaria_X	Anthozoa	Pocillopora	Pocillopora_meandrina	-
18SV4	Cluster_227	0	0	0	0	0	0	0	0	0	0	0	0	0	0	0	3	Eukaryota	Opisthokonta	Metazoa	Cnidaria	Cnidaria_X	Anthozoa	Pocillopora	Pocillopora_meandrina	-
18SV4	Cluster_228	0	0	0	0	0	0	0	3	0	0	0	0	0	0	0	0	Eukaryota	Opisthokonta	Metazoa	Cnidaria	Cnidaria_X	Anthozoa	Pocillopora	Pocillopora_meandrina	-
18SV4	Cluster_229	0	0	6	0	0	0	0	0	0	0	0	0	0	0	0	0	Eukaryota	Alveolata	Dinophyta	Dinophyceae	Suessiales	Suessiales_X	Symbiodinium	Symbiodinium_sp.	unknown
18SV4	Cluster_23	0	0	0	0	0	0	0	0	0	0	0	0	0	0	171	0	Eukaryota	Alveolata	Dinophyta	Dinophyceae	Suessiales	Suessiales_X	Symbiodinium	Multi-affiliation	A
18SV4	Cluster_230	0	0	0	0	0	0	0	0	0	0	0	0	0	0	3	0	Eukaryota	Alveolata	Dinophyta	Dinophyceae	Suessiales	Suessiales_X	Symbiodinium	Multi-affiliation	A
18SV4	Cluster_231	0	0	0	0	0	0	0	0	0	0	0	0	3	0	0	0	Eukaryota	Alveolata	Dinophyta	Dinophyceae	Suessiales	Suessiales_X	Symbiodinium	Symbiodinium_sp.	unknown
18SV4	Cluster_232	0	0	0	0	0	0	0	0	0	0	0	0	0	0	0	6	Eukaryota	Alveolata	Dinophyta	Dinophyceae	Suessiales	Suessiales_X	Symbiodinium	Multi-affiliation	A
18SV4	Cluster_233	0	0	0	0	0	0	0	0	0	0	0	0	0	0	3	0	Eukaryota	Alveolata	Dinophyta	Dinophyceae	Suessiales	Suessiales_X	Symbiodinium	Multi-affiliation	A
18SV4	Cluster_234	0	0	0	0	0	0	0	0	0	3	0	0	0	0	0	0	Eukaryota	Alveolata	Dinophyta	Dinophyceae	Suessiales	Suessiales_X	Symbiodinium	Symbiodinium_sp.	C
18SV4	Cluster_236	0	3	0	0	0	0	0	0	0	0	0	0	0	0	0	0	Eukaryota	Alveolata	Dinophyta	Dinophyceae	Suessiales	Suessiales_X	Symbiodinium	Symbiodinium_sp.	unknown
18SV4	Cluster_237	0	0	0	0	0	0	0	0	0	0	0	0	0	3	0	0	Eukaryota	Alveolata	Dinophyta	Dinophyceae	Suessiales	Suessiales_X	Symbiodinium	Symbiodinium_sp.	unknown
18SV4	Cluster_238	0	0	0	0	0	0	0	0	3	0	0	0	0	0	0	0	Eukaryota	Alveolata	Dinophyta	Dinophyceae	Suessiales	Suessiales_X	Symbiodinium	Symbiodinium_sp.	C
18SV4	Cluster_239	0	0	0	0	0	0	0	0	0	3	0	0	0	0	0	0	Eukaryota	Alveolata	Dinophyta	Dinophyceae	Suessiales	Suessiales_X	Symbiodinium	Symbiodinium_sp.	C
18SV4	Cluster_24	0	0	0	0	0	0	0	0	0	157	0	0	0	0	0	0	Eukaryota	Alveolata	Dinophyta	Dinophyceae	Suessiales	Suessiales_X	Symbiodinium	Symbiodinium_sp.	C
18SV4	Cluster_240	0	0	0	0	3	0	0	0	0	0	0	0	0	0	0	0	Eukaryota	Alveolata	Dinophyta	Dinophyceae	Suessiales	Suessiales_X	Symbiodinium	Symbiodinium_sp.	C
18SV4	Cluster_241	0	0	0	0	0	0	0	3	0	0	0	0	0	0	0	0	Eukaryota	Alveolata	Dinophyta	Dinophyceae	Suessiales	Suessiales_X	Symbiodinium	Multi-affiliation	D
18SV4	Cluster_242	0	0	0	0	0	0	0	0	0	0	0	0	0	0	0	3	Eukaryota	Alveolata	Dinophyta	Dinophyceae	Suessiales	Suessiales_X	Symbiodinium	Multi-affiliation	A
18SV4	Cluster_243	0	0	0	0	0	0	0	0	0	3	0	0	0	0	0	0	Eukaryota	Alveolata	Dinophyta	Dinophyceae	Suessiales	Suessiales_X	Symbiodinium	Multi-affiliation	D
18SV4	Cluster_244	0	0	0	0	3	0	0	0	0	0	0	0	0	0	0	0	Eukaryota	Alveolata	Dinophyta	Dinophyceae	Suessiales	Suessiales_X	Symbiodinium	Symbiodinium_sp.	C
18SV4	Cluster_245	0	0	0	0	0	0	0	0	0	3	0	0	0	0	0	0	Eukaryota	Alveolata	Dinophyta	Dinophyceae	Suessiales	Suessiales_X	Symbiodinium	Symbiodinium_sp.	C
18SV4	Cluster_247	0	0	3	0	0	0	0	0	0	0	0	0	0	0	0	0	Eukaryota	Alveolata	Dinophyta	Dinophyceae	Suessiales	Suessiales_X	Symbiodinium	Symbiodinium_sp.	unknown
18SV4	Cluster_25	0	0	0	0	0	0	0	0	0	0	0	135	0	0	0	0	Eukaryota	Alveolata	Dinophyta	Dinophyceae	Suessiales	Suessiales_X	Symbiodinium	Symbiodinium_sp.	unknown
18SV4	Cluster_255	0	0	0	0	0	0	0	0	0	6	0	0	0	0	0	0	Eukaryota	Alveolata	Dinophyta	Dinophyceae	Suessiales	Suessiales_X	Symbiodinium	Symbiodinium_sp.	C
18SV4	Cluster_257	0	0	0	0	0	0	0	3	0	0	0	0	0	0	0	0	Eukaryota	Opisthokonta	Metazoa	Cnidaria	Cnidaria_X	Anthozoa	Pocillopora	Pocillopora_meandrina	-
18SV4	Cluster_26	0	0	0	0	0	0	0	0	0	0	0	0	0	0	144	0	Eukaryota	Alveolata	Dinophyta	Dinophyceae	Suessiales	Suessiales_X	Symbiodinium	Multi-affiliation	A
18SV4	Cluster_263	0	0	0	0	0	0	3	0	0	0	0	0	0	0	0	0	Eukaryota	Opisthokonta	Metazoa	Cnidaria	Cnidaria_X	Anthozoa	Pocillopora	Pocillopora_meandrina	-
18SV4	Cluster_27	0	0	0	0	0	0	0	0	0	231	0	0	0	0	0	0	Eukaryota	Alveolata	Dinophyta	Dinophyceae	Suessiales	Suessiales_X	Symbiodinium	Multi-affiliation	D
18SV4	Cluster_271	0	0	0	0	0	0	0	0	0	0	0	3	0	0	0	0	Eukaryota	Opisthokonta	Metazoa	Cnidaria	Cnidaria_X	Anthozoa	Pocillopora	Pocillopora_meandrina	-
18SV4	Cluster_272	0	0	0	0	0	0	0	0	3	0	0	0	0	0	0	0	Eukaryota	Opisthokonta	Metazoa	Cnidaria	Cnidaria_X	Anthozoa	Pocillopora	Pocillopora_meandrina	-
18SV4	Cluster_28	0	0	0	0	0	0	117	0	0	0	0	0	0	0	0	0	Eukaryota	Alveolata	Dinophyta	Dinophyceae	Suessiales	Suessiales_X	Symbiodinium	Multi-affiliation	D
18SV4	Cluster_289	0	0	0	0	3	0	0	0	0	0	0	0	0	0	0	0	Eukaryota	Opisthokonta	Metazoa	Cnidaria	Cnidaria_X	Anthozoa	Pocillopora	Pocillopora_meandrina	-
18SV4	Cluster_29	0	0	0	0	0	0	95	0	0	0	0	0	0	0	0	0	Eukaryota	Alveolata	Dinophyta	Dinophyceae	Suessiales	Suessiales_X	Symbiodinium	Symbiodinium_sp.	C
18SV4	Cluster_292	0	0	0	0	0	0	0	0	0	3	0	0	0	0	0	0	Eukaryota	Alveolata	Dinophyta	Dinophyceae	Suessiales	Suessiales_X	Symbiodinium	Symbiodinium_sp.	C
18SV4	Cluster_29302	0	0	0	0	0	0	0	0	0	0	0	0	8	0	3	5	Eukaryota	Alveolata	Dinophyta	Dinophyceae	Suessiales	Suessiales_X	Symbiodinium	Multi-affiliation	A
18SV4	Cluster_297	0	0	0	0	0	0	0	0	0	4	0	0	0	0	0	0	Eukaryota	Alveolata	Dinophyta	Dinophyceae	Suessiales	Suessiales_X	Symbiodinium	Symbiodinium_sp.	C
18SV4	Cluster_3	18766	15445	6033	0	14	0	0	0	0	3	9733	15049	297	12183	294	6938	Eukaryota	Alveolata	Dinophyta	Dinophyceae	Suessiales	Suessiales_X	Symbiodinium	Symbiodinium_sp.	unknown
18SV4	Cluster_30	0	0	0	3	0	95	97	20	8	0	0	0	0	0	0	0	Eukaryota	Opisthokonta	Metazoa	Arthropoda	Crustacea	Maxillopoda	Xarifia	Xarifia_sp.	-
18SV4	Cluster_300	0	0	0	0	0	0	0	0	0	3	0	0	0	0	0	0	Eukaryota	Alveolata	Dinophyta	Dinophyceae	Suessiales	Suessiales_X	Symbiodinium	Multi-affiliation	D
18SV4	Cluster_30147	0	0	0	0	0	0	0	0	0	3	0	0	0	0	0	0	Eukaryota	Alveolata	Dinophyta	Dinophyceae	Suessiales	Suessiales_X	Symbiodinium	Symbiodinium_sp.	C
18SV4	Cluster_306	0	0	0	0	0	0	0	0	0	0	0	0	0	0	3	0	Eukaryota	Multi-affiliation	Multi-affiliation	Multi-affiliation	Multi-affiliation	Multi-affiliation	Multi-affiliation	Multi-affiliation	-
18SV4	Cluster_30682	0	0	0	0	0	0	0	0	0	3	0	0	0	0	0	0	Eukaryota	Alveolata	Dinophyta	Dinophyceae	Suessiales	Suessiales_X	Symbiodinium	Symbiodinium_sp.	C
18SV4	Cluster_30708	0	0	0	0	0	0	0	0	0	0	0	0	0	0	4	0	Eukaryota	Alveolata	Dinophyta	Dinophyceae	Suessiales	Suessiales_X	Symbiodinium	Multi-affiliation	A
18SV4	Cluster_308	3	0	0	0	0	0	0	0	0	0	0	0	0	0	0	0	Eukaryota	Alveolata	Dinophyta	Dinophyceae	Suessiales	Suessiales_X	Symbiodinium	Symbiodinium_sp.	unknown
18SV4	Cluster_313	0	0	0	0	0	0	0	0	0	4	0	0	0	0	0	0	Eukaryota	Alveolata	Dinophyta	Dinophyceae	Suessiales	Suessiales_X	Symbiodinium	Symbiodinium_sp.	C
18SV4	Cluster_31330	0	0	0	0	0	0	0	0	0	0	0	0	0	0	5	0	Eukaryota	Alveolata	Dinophyta	Dinophyceae	Suessiales	Suessiales_X	Symbiodinium	Multi-affiliation	A
18SV4	Cluster_316	0	0	0	0	0	0	0	0	0	0	0	0	0	0	3	0	Eukaryota	Alveolata	Dinophyta	Dinophyceae	Suessiales	Suessiales_X	Symbiodinium	Multi-affiliation	A
18SV4	Cluster_32	0	0	0	0	0	0	91	0	0	0	0	0	0	0	0	0	Eukaryota	Alveolata	Dinophyta	Dinophyceae	Suessiales	Suessiales_X	Symbiodinium	Multi-affiliation	D
18SV4	Cluster_32036	0	0	0	0	0	0	0	0	0	0	0	0	0	0	0	3	Eukaryota	Alveolata	Dinophyta	Dinophyceae	Suessiales	Suessiales_X	Symbiodinium	Multi-affiliation	unknown
18SV4	Cluster_32097	0	0	0	0	0	0	0	0	0	0	0	0	0	0	3	0	Eukaryota	Alveolata	Dinophyta	Dinophyceae	Suessiales	Suessiales_X	Symbiodinium	Multi-affiliation	unknown
18SV4	Cluster_326	0	0	0	0	0	0	0	0	0	0	0	0	0	0	3	0	Eukaryota	Alveolata	Dinophyta	Dinophyceae	Suessiales	Suessiales_X	Symbiodinium	Multi-affiliation	A
18SV4	Cluster_32606	0	0	0	0	0	0	0	0	0	0	0	0	0	0	3	0	Eukaryota	Alveolata	Dinophyta	Dinophyceae	Suessiales	Suessiales_X	Symbiodinium	Multi-affiliation	A
18SV4	Cluster_328	0	0	0	0	0	0	0	0	0	0	0	0	0	0	0	3	Eukaryota	Alveolata	Dinophyta	Dinophyceae	Suessiales	Suessiales_X	Symbiodinium	Symbiodinium_sp.	B
18SV4	Cluster_33	0	0	0	0	0	0	3	0	6	177	0	0	0	0	0	0	Eukaryota	Alveolata	Dinophyta	Dinophyceae	Suessiales	Suessiales_X	Symbiodinium	Multi-affiliation	D
18SV4	Cluster_332	0	0	0	0	0	0	0	0	0	3	0	0	0	0	0	0	Eukaryota	Alveolata	Dinophyta	Dinophyceae	Suessiales	Suessiales_X	Symbiodinium	Symbiodinium_sp.	C
18SV4	Cluster_336	0	0	0	0	0	0	0	0	0	6	0	0	0	0	0	0	Eukaryota	Alveolata	Dinophyta	Dinophyceae	Suessiales	Suessiales_X	Symbiodinium	Symbiodinium_sp.	C
18SV4	Cluster_337	0	0	0	0	0	0	0	0	0	5	0	0	0	0	0	0	Eukaryota	Alveolata	Dinophyta	Dinophyceae	Suessiales	Suessiales_X	Symbiodinium	Symbiodinium_sp.	C
18SV4	Cluster_338	0	0	0	0	0	0	0	0	0	0	0	0	3	0	0	0	Eukaryota	Multi-affiliation	Multi-affiliation	Multi-affiliation	Multi-affiliation	Multi-affiliation	Multi-affiliation	Multi-affiliation	-
18SV4	Cluster_34	0	0	0	0	0	0	0	85	13	0	0	0	0	0	0	0	Eukaryota	Alveolata	Dinophyta	Dinophyceae	Suessiales	Suessiales_X	Symbiodinium	Symbiodinium_sp.	C
18SV4	Cluster_341	0	0	0	0	0	0	0	0	0	3	0	0	0	0	0	0	Eukaryota	Alveolata	Dinophyta	Dinophyceae	Suessiales	Suessiales_X	Symbiodinium	Symbiodinium_sp.	C
18SV4	Cluster_344	0	0	0	3	0	0	0	0	0	0	0	0	0	0	0	0	Eukaryota	Alveolata	Dinophyta	Dinophyceae	Suessiales	Suessiales_X	Symbiodinium	Symbiodinium_sp.	C
18SV4	Cluster_34768	0	0	0	0	0	0	0	0	0	0	0	0	3	0	0	0	Eukaryota	Alveolata	Dinophyta	Dinophyceae	Suessiales	Suessiales_X	Symbiodinium	Multi-affiliation	A
18SV4	Cluster_35	0	0	0	0	0	0	0	87	0	0	0	0	0	0	0	0	Eukaryota	Alveolata	Dinophyta	Dinophyceae	Suessiales	Suessiales_X	Symbiodinium	Symbiodinium_sp.	C
18SV4	Cluster_36	0	0	0	11	18	0	0	60	5	42	0	0	0	0	0	0	Eukaryota	Alveolata	Dinophyta	Dinophyceae	Suessiales	Suessiales_X	Symbiodinium	Multi-affiliation	D
18SV4	Cluster_366	4	0	0	0	0	0	0	0	0	0	0	0	0	0	0	0	Eukaryota	Alveolata	Dinophyta	Dinophyceae	Suessiales	Suessiales_X	Symbiodinium	Symbiodinium_sp.	unknown
18SV4	Cluster_37471	0	0	0	0	0	0	0	0	3	0	0	0	0	0	0	0	Eukaryota	Alveolata	Dinophyta	Dinophyceae	Suessiales	Suessiales_X	Symbiodinium	Symbiodinium_sp.	C
18SV4	Cluster_37476	0	0	0	0	0	0	0	0	0	3	0	0	0	0	0	0	Eukaryota	Alveolata	Dinophyta	Dinophyceae	Suessiales	Suessiales_X	Symbiodinium	Symbiodinium_sp.	C
18SV4	Cluster_37491	0	0	0	0	0	0	0	0	0	0	0	0	12	0	11	5	Eukaryota	Alveolata	Dinophyta	Dinophyceae	Suessiales	Suessiales_X	Symbiodinium	Multi-affiliation	A
18SV4	Cluster_37505	0	0	0	3	0	0	0	0	0	0	0	0	0	0	0	0	Eukaryota	Alveolata	Dinophyta	Dinophyceae	Suessiales	Suessiales_X	Symbiodinium	Symbiodinium_sp.	C
18SV4	Cluster_376	0	0	0	0	0	0	0	0	0	0	0	3	0	0	0	0	Eukaryota	Alveolata	Dinophyta	Dinophyceae	Suessiales	Suessiales_X	Symbiodinium	Symbiodinium_sp.	unknown
18SV4	Cluster_37680	0	0	0	0	0	0	0	0	0	3	0	0	0	0	0	0	Eukaryota	Alveolata	Dinophyta	Dinophyceae	Suessiales	Suessiales_X	Symbiodinium	Symbiodinium_sp.	C
18SV4	Cluster_37687	0	0	0	0	0	0	3	0	0	0	0	0	0	0	0	0	Eukaryota	Alveolata	Dinophyta	Dinophyceae	Suessiales	Suessiales_X	Symbiodinium	Symbiodinium_sp.	C
18SV4	Cluster_37911	0	0	0	0	0	0	0	0	0	3	0	0	0	0	0	0	Eukaryota	Alveolata	Dinophyta	Dinophyceae	Suessiales	Suessiales_X	Symbiodinium	Symbiodinium_sp.	C
18SV4	Cluster_37996	0	0	0	0	0	0	0	0	0	3	0	0	0	0	0	0	Eukaryota	Alveolata	Dinophyta	Dinophyceae	Suessiales	Suessiales_X	Symbiodinium	Symbiodinium_sp.	C
18SV4	Cluster_38	0	0	0	0	0	0	0	0	0	79	0	0	0	0	0	0	Eukaryota	Alveolata	Dinophyta	Dinophyceae	Suessiales	Suessiales_X	Symbiodinium	Symbiodinium_sp.	C
18SV4	Cluster_38173	0	0	0	0	0	0	0	0	3	0	0	0	0	0	0	0	Eukaryota	Alveolata	Dinophyta	Dinophyceae	Suessiales	Suessiales_X	Symbiodinium	Symbiodinium_sp.	C
18SV4	Cluster_38201	0	0	0	0	0	0	0	0	0	3	0	0	0	0	0	0	Eukaryota	Alveolata	Dinophyta	Dinophyceae	Suessiales	Suessiales_X	Symbiodinium	Symbiodinium_sp.	C
18SV4	Cluster_38218	0	0	0	0	0	0	0	0	0	5	0	0	0	0	0	0	Eukaryota	Alveolata	Dinophyta	Dinophyceae	Suessiales	Suessiales_X	Symbiodinium	Symbiodinium_sp.	C
18SV4	Cluster_38221	0	0	0	0	0	0	0	0	0	3	0	0	0	0	0	0	Eukaryota	Alveolata	Dinophyta	Dinophyceae	Suessiales	Suessiales_X	Symbiodinium	Symbiodinium_sp.	C
18SV4	Cluster_38349	0	0	0	0	0	0	3	0	0	8	0	0	0	0	0	0	Eukaryota	Alveolata	Dinophyta	Dinophyceae	Suessiales	Suessiales_X	Symbiodinium	Symbiodinium_sp.	C
18SV4	Cluster_38874	0	0	0	0	0	0	0	0	0	3	0	0	0	0	0	0	Eukaryota	Alveolata	Dinophyta	Dinophyceae	Suessiales	Suessiales_X	Symbiodinium	Symbiodinium_sp.	C
18SV4	Cluster_38886	0	0	0	0	0	0	0	0	0	0	0	0	0	0	0	3	Eukaryota	Alveolata	Dinophyta	Dinophyceae	Suessiales	Suessiales_X	Symbiodinium	Symbiodinium_sp.	A
18SV4	Cluster_38954	0	0	0	0	0	0	0	0	0	5	0	0	0	0	0	0	Eukaryota	Alveolata	Dinophyta	Dinophyceae	Suessiales	Suessiales_X	Symbiodinium	Symbiodinium_sp.	C
18SV4	Cluster_38998	0	0	0	0	0	0	0	0	0	3	0	0	0	0	0	0	Eukaryota	Alveolata	Dinophyta	Dinophyceae	Suessiales	Suessiales_X	Symbiodinium	Symbiodinium_sp.	C
18SV4	Cluster_391	0	0	0	0	0	0	0	0	0	0	0	0	0	0	5	0	Eukaryota	Alveolata	Dinophyta	Dinophyceae	Suessiales	Suessiales_X	Symbiodinium	Multi-affiliation	A
18SV4	Cluster_392	0	0	0	0	0	0	0	0	0	3	0	0	0	0	0	0	Eukaryota	Alveolata	Dinophyta	Dinophyceae	Suessiales	Suessiales_X	Symbiodinium	Symbiodinium_sp.	C
18SV4	Cluster_39276	0	0	0	0	3	0	0	0	0	0	0	0	0	0	0	0	Eukaryota	Alveolata	Dinophyta	Dinophyceae	Suessiales	Suessiales_X	Symbiodinium	Symbiodinium_sp.	C
18SV4	Cluster_39321	0	0	0	3	0	0	0	0	0	0	0	0	0	0	0	0	Eukaryota	Alveolata	Dinophyta	Dinophyceae	Suessiales	Suessiales_X	Symbiodinium	Symbiodinium_sp.	C
18SV4	Cluster_395	0	0	0	0	0	0	0	0	0	0	0	0	0	0	0	4	Eukaryota	Alveolata	Dinophyta	Dinophyceae	Suessiales	Suessiales_X	Symbiodinium	Multi-affiliation	A
18SV4	Cluster_397	0	0	0	0	0	0	3	0	0	0	0	0	0	0	0	0	Eukaryota	Alveolata	Dinophyta	Dinophyceae	Suessiales	Suessiales_X	Symbiodinium	Symbiodinium_sp.	C
18SV4	Cluster_39756	0	0	0	0	0	0	6	0	0	7	0	0	0	0	0	0	Eukaryota	Alveolata	Dinophyta	Dinophyceae	Suessiales	Suessiales_X	Symbiodinium	Symbiodinium_sp.	C
18SV4	Cluster_39813	0	0	0	0	0	0	0	0	0	0	0	0	0	0	3	3	Eukaryota	Alveolata	Dinophyta	Dinophyceae	Suessiales	Suessiales_X	Symbiodinium	Multi-affiliation	A
18SV4	Cluster_4	590	0	0	0	0	0	0	0	0	0	18	0	30364	9	34513	14463	Eukaryota	Alveolata	Dinophyta	Dinophyceae	Suessiales	Suessiales_X	Symbiodinium	Multi-affiliation	A
18SV4	Cluster_40	0	0	0	0	0	0	0	69	0	0	0	0	0	0	0	0	Eukaryota	Alveolata	Dinophyta	Dinophyceae	Suessiales	Suessiales_X	Symbiodinium	Symbiodinium_sp.	C
18SV4	Cluster_403	0	0	0	0	0	0	6	0	0	0	0	0	0	0	0	0	Eukaryota	Alveolata	Dinophyta	Dinophyceae	Suessiales	Suessiales_X	Symbiodinium	Symbiodinium_sp.	C
18SV4	Cluster_405	0	0	0	0	0	0	0	0	0	4	0	0	0	0	0	0	Eukaryota	Alveolata	Dinophyta	Dinophyceae	Suessiales	Suessiales_X	Symbiodinium	Symbiodinium_sp.	C
18SV4	Cluster_41	0	0	0	0	0	69	0	0	0	0	0	0	0	0	0	0	Eukaryota	Alveolata	Dinophyta	Dinophyceae	Suessiales	Suessiales_X	Symbiodinium	Multi-affiliation	D
18SV4	Cluster_410	0	0	0	0	0	0	0	0	0	3	0	0	0	0	0	0	Eukaryota	Alveolata	Dinophyta	Dinophyceae	Suessiales	Suessiales_X	Symbiodinium	Symbiodinium_sp.	C
18SV4	Cluster_412	0	0	0	0	0	0	0	0	0	3	0	0	0	0	0	0	Eukaryota	Alveolata	Dinophyta	Dinophyceae	Suessiales	Suessiales_X	Symbiodinium	Symbiodinium_sp.	C
18SV4	Cluster_413	0	0	0	0	0	0	0	0	0	4	0	0	0	0	0	0	Eukaryota	Alveolata	Dinophyta	Dinophyceae	Suessiales	Suessiales_X	Symbiodinium	Symbiodinium_sp.	C
18SV4	Cluster_415	0	0	0	0	0	0	0	0	0	7	0	0	0	0	0	0	Eukaryota	Alveolata	Dinophyta	Dinophyceae	Suessiales	Suessiales_X	Symbiodinium	Symbiodinium_sp.	C
18SV4	Cluster_416	0	0	0	0	0	0	0	0	0	4	0	0	0	0	0	0	Eukaryota	Alveolata	Dinophyta	Dinophyceae	Suessiales	Suessiales_X	Symbiodinium	Symbiodinium_sp.	C
18SV4	Cluster_417	0	0	0	0	0	0	0	0	0	3	0	0	0	0	0	0	Eukaryota	Alveolata	Dinophyta	Dinophyceae	Suessiales	Suessiales_X	Symbiodinium	Symbiodinium_sp.	C
18SV4	Cluster_42	0	0	0	8	0	7	24	0	0	43	0	0	0	0	0	0	Eukaryota	Alveolata	Dinophyta	Dinophyceae	Suessiales	Suessiales_X	Symbiodinium	Multi-affiliation	D
18SV4	Cluster_421	0	0	0	0	0	0	0	0	0	4	0	0	0	0	0	0	Eukaryota	Alveolata	Dinophyta	Dinophyceae	Suessiales	Suessiales_X	Symbiodinium	Symbiodinium_sp.	C
18SV4	Cluster_424	0	0	0	0	0	0	0	0	0	10	0	0	0	0	0	0	Eukaryota	Alveolata	Dinophyta	Dinophyceae	Suessiales	Suessiales_X	Symbiodinium	Symbiodinium_sp.	C
18SV4	Cluster_426	0	0	0	0	0	0	0	0	0	6	0	0	0	0	0	0	Eukaryota	Alveolata	Dinophyta	Dinophyceae	Suessiales	Suessiales_X	Symbiodinium	Symbiodinium_sp.	C
18SV4	Cluster_43	0	0	0	0	0	0	0	0	0	56	0	0	0	0	0	0	Eukaryota	Alveolata	Dinophyta	Dinophyceae	Suessiales	Suessiales_X	Symbiodinium	Multi-affiliation	D
18SV4	Cluster_430	0	0	0	0	0	0	0	3	0	0	0	0	0	0	0	0	Eukaryota	Alveolata	Dinophyta	Dinophyceae	Suessiales	Suessiales_X	Symbiodinium	Symbiodinium_sp.	C
18SV4	Cluster_433	0	0	0	0	0	0	4	0	0	0	0	0	0	0	0	0	Eukaryota	Alveolata	Dinophyta	Dinophyceae	Suessiales	Suessiales_X	Symbiodinium	Symbiodinium_sp.	C
18SV4	Cluster_4357	0	0	0	3	0	0	0	0	0	0	0	0	0	0	0	0	Eukaryota	Opisthokonta	Metazoa	Cnidaria	Cnidaria_X	Anthozoa	Pocillopora	Pocillopora_meandrina	-
18SV4	Cluster_440	0	0	0	0	0	0	0	0	0	3	0	0	0	0	0	0	Eukaryota	Alveolata	Dinophyta	Dinophyceae	Suessiales	Suessiales_X	Symbiodinium	Symbiodinium_sp.	C
18SV4	Cluster_443	0	0	0	0	0	0	0	0	3	0	0	0	0	0	0	0	Eukaryota	Alveolata	Dinophyta	Dinophyceae	Suessiales	Suessiales_X	Symbiodinium	Symbiodinium_sp.	C
18SV4	Cluster_445	0	0	0	0	0	0	0	0	0	4	0	0	0	0	0	0	Eukaryota	Alveolata	Dinophyta	Dinophyceae	Suessiales	Suessiales_X	Symbiodinium	Symbiodinium_sp.	C
18SV4	Cluster_447	0	0	0	0	0	0	0	0	0	7	0	0	0	0	0	0	Eukaryota	Alveolata	Dinophyta	Dinophyceae	Suessiales	Suessiales_X	Symbiodinium	Symbiodinium_sp.	C
18SV4	Cluster_45	0	0	0	0	0	0	29	17	0	12	0	0	0	0	0	0	Eukaryota	Alveolata	Dinophyta	Dinophyceae	Suessiales	Suessiales_X	Symbiodinium	Multi-affiliation	unknown
18SV4	Cluster_450	0	0	0	0	0	0	0	0	0	4	0	0	0	0	0	0	Eukaryota	Alveolata	Dinophyta	Dinophyceae	Suessiales	Suessiales_X	Symbiodinium	Symbiodinium_sp.	C
18SV4	Cluster_45257	0	0	0	0	0	0	0	0	0	3	0	0	0	0	0	0	Eukaryota	Alveolata	Dinophyta	Dinophyceae	Suessiales	Suessiales_X	Symbiodinium	Symbiodinium_sp.	C
18SV4	Cluster_45369	0	0	0	0	0	0	0	0	0	5	0	0	0	0	0	0	Eukaryota	Alveolata	Dinophyta	Dinophyceae	Suessiales	Suessiales_X	Symbiodinium	Symbiodinium_sp.	C
18SV4	Cluster_45683	0	0	0	0	0	0	0	0	0	0	0	0	3	0	0	0	Eukaryota	Alveolata	Dinophyta	Dinophyceae	Suessiales	Suessiales_X	Symbiodinium	Multi-affiliation	unknown
18SV4	Cluster_45996	0	0	0	0	0	0	0	0	0	5	0	0	0	0	0	0	Eukaryota	Alveolata	Dinophyta	Dinophyceae	Suessiales	Suessiales_X	Symbiodinium	Symbiodinium_sp.	C
18SV4	Cluster_45998	0	0	0	0	0	0	0	0	0	3	0	0	0	0	0	0	Eukaryota	Alveolata	Dinophyta	Dinophyceae	Suessiales	Suessiales_X	Symbiodinium	Symbiodinium_sp.	C
18SV4	Cluster_46	0	47	0	0	0	0	0	0	0	0	0	0	0	0	0	0	Eukaryota	Alveolata	Dinophyta	Dinophyceae	Suessiales	Suessiales_X	Symbiodinium	Symbiodinium_sp.	unknown
18SV4	Cluster_46326	0	0	0	0	0	0	0	0	0	6	0	0	0	0	0	0	Eukaryota	Alveolata	Dinophyta	Dinophyceae	Suessiales	Suessiales_X	Symbiodinium	Symbiodinium_sp.	C
18SV4	Cluster_46330	0	0	0	0	0	0	0	0	0	13	0	0	0	0	0	0	Eukaryota	Alveolata	Dinophyta	Dinophyceae	Suessiales	Suessiales_X	Symbiodinium	Symbiodinium_sp.	C
18SV4	Cluster_46345	0	0	0	0	0	0	0	0	0	3	0	0	0	0	0	0	Eukaryota	Alveolata	Dinophyta	Dinophyceae	Suessiales	Suessiales_X	Symbiodinium	Symbiodinium_sp.	C
18SV4	Cluster_46636	0	0	0	0	0	0	0	0	0	3	0	0	0	0	0	0	Eukaryota	Alveolata	Dinophyta	Dinophyceae	Suessiales	Suessiales_X	Symbiodinium	Symbiodinium_sp.	C
18SV4	Cluster_467	0	0	0	0	0	0	0	0	0	0	0	0	0	0	6	0	Eukaryota	Alveolata	Dinophyta	Dinophyceae	Suessiales	Suessiales_X	Symbiodinium	Multi-affiliation	A
18SV4	Cluster_46718	0	0	0	0	0	0	0	0	0	5	0	0	0	0	0	0	Eukaryota	Alveolata	Dinophyta	Dinophyceae	Suessiales	Suessiales_X	Symbiodinium	Symbiodinium_sp.	C
18SV4	Cluster_46741	0	0	0	0	0	0	0	0	0	3	0	0	0	0	0	0	Eukaryota	Alveolata	Dinophyta	Dinophyceae	Suessiales	Suessiales_X	Symbiodinium	Symbiodinium_sp.	C
18SV4	Cluster_46808	0	0	0	0	0	0	0	0	0	6	0	0	0	0	0	0	Eukaryota	Alveolata	Dinophyta	Dinophyceae	Suessiales	Suessiales_X	Symbiodinium	Symbiodinium_sp.	C
18SV4	Cluster_469	0	0	0	0	0	0	0	0	0	0	0	0	0	0	0	4	Eukaryota	Alveolata	Dinophyta	Dinophyceae	Suessiales	Suessiales_X	Symbiodinium	Symbiodinium_sp.	unknown
18SV4	Cluster_46944	0	0	0	0	0	0	0	0	0	3	0	0	0	0	0	0	Eukaryota	Alveolata	Dinophyta	Dinophyceae	Suessiales	Suessiales_X	Symbiodinium	Symbiodinium_sp.	C
18SV4	Cluster_46957	0	0	0	0	0	0	0	0	0	7	0	0	0	0	0	0	Eukaryota	Alveolata	Dinophyta	Dinophyceae	Suessiales	Suessiales_X	Symbiodinium	Symbiodinium_sp.	C
18SV4	Cluster_470	0	0	0	0	0	0	0	0	0	0	0	0	0	0	0	3	Eukaryota	Alveolata	Dinophyta	Dinophyceae	Suessiales	Suessiales_X	Symbiodinium	Multi-affiliation	A
18SV4	Cluster_47170	0	0	0	0	0	0	0	0	0	5	0	0	0	0	0	0	Eukaryota	Alveolata	Dinophyta	Dinophyceae	Suessiales	Suessiales_X	Symbiodinium	Symbiodinium_sp.	C
18SV4	Cluster_47191	0	0	0	0	0	0	0	0	0	3	0	0	0	0	0	0	Eukaryota	Alveolata	Dinophyta	Dinophyceae	Suessiales	Suessiales_X	Symbiodinium	Symbiodinium_sp.	C
18SV4	Cluster_472	0	0	0	0	0	0	0	0	0	0	0	0	5	0	0	0	Eukaryota	Alveolata	Dinophyta	Dinophyceae	Suessiales	Suessiales_X	Symbiodinium	Multi-affiliation	A
18SV4	Cluster_47333	0	0	0	0	0	0	0	0	0	3	0	0	0	0	0	0	Eukaryota	Alveolata	Dinophyta	Dinophyceae	Suessiales	Suessiales_X	Symbiodinium	Symbiodinium_sp.	C
18SV4	Cluster_47383	0	0	0	0	0	0	0	0	0	3	0	0	0	0	0	0	Eukaryota	Alveolata	Dinophyta	Dinophyceae	Suessiales	Suessiales_X	Symbiodinium	Symbiodinium_sp.	C
18SV4	Cluster_474	0	0	0	0	0	0	0	0	0	0	0	0	3	0	0	0	Eukaryota	Alveolata	Dinophyta	Dinophyceae	Suessiales	Suessiales_X	Symbiodinium	Multi-affiliation	A
18SV4	Cluster_47454	0	0	0	0	0	0	0	0	0	3	0	0	0	0	0	0	Eukaryota	Alveolata	Dinophyta	Dinophyceae	Suessiales	Suessiales_X	Symbiodinium	Symbiodinium_sp.	C
18SV4	Cluster_47495	0	0	0	0	0	0	0	0	0	3	0	0	0	0	0	0	Eukaryota	Alveolata	Dinophyta	Dinophyceae	Suessiales	Suessiales_X	Symbiodinium	Symbiodinium_sp.	C
18SV4	Cluster_47518	0	0	0	0	0	0	6	0	0	0	0	0	0	0	0	0	Eukaryota	Alveolata	Dinophyta	Dinophyceae	Suessiales	Suessiales_X	Symbiodinium	Symbiodinium_sp.	C
18SV4	Cluster_47545	0	0	0	0	0	0	0	0	0	10	0	0	0	0	0	0	Eukaryota	Alveolata	Dinophyta	Dinophyceae	Suessiales	Suessiales_X	Symbiodinium	Symbiodinium_sp.	C
18SV4	Cluster_476	0	0	0	0	0	0	0	0	0	0	0	0	0	0	5	0	Eukaryota	Alveolata	Dinophyta	Dinophyceae	Suessiales	Suessiales_X	Symbiodinium	Multi-affiliation	A
18SV4	Cluster_47657	0	0	0	0	0	0	0	0	0	3	0	0	0	0	0	0	Eukaryota	Alveolata	Dinophyta	Dinophyceae	Suessiales	Suessiales_X	Symbiodinium	Symbiodinium_sp.	C
18SV4	Cluster_47767	0	0	0	0	0	0	4	0	0	3	0	0	0	0	0	0	Eukaryota	Alveolata	Dinophyta	Dinophyceae	Suessiales	Suessiales_X	Symbiodinium	Symbiodinium_sp.	C
18SV4	Cluster_47821	0	0	0	0	0	0	0	0	0	3	0	0	0	0	0	0	Eukaryota	Alveolata	Dinophyta	Dinophyceae	Suessiales	Suessiales_X	Symbiodinium	Symbiodinium_sp.	C
18SV4	Cluster_47931	0	0	0	0	0	0	3	0	0	0	0	0	0	0	0	0	Eukaryota	Alveolata	Dinophyta	Dinophyceae	Suessiales	Suessiales_X	Symbiodinium	Symbiodinium_sp.	C
18SV4	Cluster_47984	0	0	0	0	0	0	0	0	0	4	0	0	0	0	0	0	Eukaryota	Alveolata	Dinophyta	Dinophyceae	Suessiales	Suessiales_X	Symbiodinium	Symbiodinium_sp.	C
18SV4	Cluster_47996	0	0	0	0	0	0	0	0	0	4	0	0	0	0	0	0	Eukaryota	Alveolata	Dinophyta	Dinophyceae	Suessiales	Suessiales_X	Symbiodinium	Symbiodinium_sp.	C
18SV4	Cluster_482	0	0	0	0	0	0	0	0	0	0	0	0	9	0	11	6	Eukaryota	Alveolata	Dinophyta	Dinophyceae	Suessiales	Suessiales_X	Symbiodinium	Multi-affiliation	A
18SV4	Cluster_483	0	0	0	0	0	0	0	0	0	0	0	0	3	0	4	0	Eukaryota	Alveolata	Dinophyta	Dinophyceae	Suessiales	Suessiales_X	Symbiodinium	Multi-affiliation	A
18SV4	Cluster_48336	0	0	0	0	0	0	0	0	0	4	0	0	0	0	0	0	Eukaryota	Alveolata	Dinophyta	Dinophyceae	Suessiales	Suessiales_X	Symbiodinium	Symbiodinium_sp.	C
18SV4	Cluster_48386	0	0	0	0	0	0	0	0	0	4	0	0	0	0	0	0	Eukaryota	Alveolata	Dinophyta	Dinophyceae	Suessiales	Suessiales_X	Symbiodinium	Symbiodinium_sp.	C
18SV4	Cluster_48563	0	0	0	0	0	0	0	0	0	3	0	0	0	0	0	0	Eukaryota	Alveolata	Dinophyta	Dinophyceae	Suessiales	Suessiales_X	Symbiodinium	Symbiodinium_sp.	C
18SV4	Cluster_486	0	0	0	0	0	0	0	0	0	0	0	0	0	0	3	0	Eukaryota	Alveolata	Dinophyta	Dinophyceae	Suessiales	Suessiales_X	Symbiodinium	Multi-affiliation	A
18SV4	Cluster_48632	0	0	0	0	0	0	0	0	0	3	0	0	0	0	0	0	Eukaryota	Alveolata	Dinophyta	Dinophyceae	Suessiales	Suessiales_X	Symbiodinium	Symbiodinium_sp.	C
18SV4	Cluster_487	0	0	0	0	0	0	0	0	0	0	0	0	0	0	4	0	Eukaryota	Alveolata	Dinophyta	Dinophyceae	Suessiales	Suessiales_X	Symbiodinium	Multi-affiliation	A
18SV4	Cluster_48813	0	0	0	0	0	0	0	0	0	3	0	0	0	0	0	0	Eukaryota	Alveolata	Dinophyta	Dinophyceae	Suessiales	Suessiales_X	Symbiodinium	Symbiodinium_sp.	C
18SV4	Cluster_489	0	0	0	0	0	0	0	0	0	0	0	0	9	0	0	0	Eukaryota	Alveolata	Dinophyta	Dinophyceae	Suessiales	Suessiales_X	Symbiodinium	Multi-affiliation	A
18SV4	Cluster_491	0	0	0	0	0	0	0	0	0	0	0	0	3	0	4	5	Eukaryota	Alveolata	Dinophyta	Dinophyceae	Suessiales	Suessiales_X	Symbiodinium	Multi-affiliation	A
18SV4	Cluster_49103	0	0	0	0	0	0	0	0	0	6	0	0	0	0	0	0	Eukaryota	Alveolata	Dinophyta	Dinophyceae	Suessiales	Suessiales_X	Symbiodinium	Symbiodinium_sp.	C
18SV4	Cluster_49121	0	0	0	0	0	0	0	0	0	3	0	0	0	0	0	0	Eukaryota	Alveolata	Dinophyta	Dinophyceae	Suessiales	Suessiales_X	Symbiodinium	Symbiodinium_sp.	C
18SV4	Cluster_493	0	0	0	0	0	0	0	0	0	0	0	0	3	0	0	0	Eukaryota	Alveolata	Dinophyta	Dinophyceae	Suessiales	Suessiales_X	Symbiodinium	Multi-affiliation	A
18SV4	Cluster_49855	0	0	0	0	0	0	0	0	0	0	0	0	0	0	4	5	Eukaryota	Alveolata	Dinophyta	Dinophyceae	Suessiales	Suessiales_X	Symbiodinium	Multi-affiliation	A
18SV4	Cluster_499	0	0	0	0	3	0	0	0	0	0	0	0	0	0	0	0	Eukaryota	Alveolata	Dinophyta	Dinophyceae	Suessiales	Suessiales_X	Symbiodinium	Symbiodinium_sp.	C
18SV4	Cluster_49995	0	0	0	0	0	0	0	0	0	0	0	0	0	0	3	0	Eukaryota	Alveolata	Dinophyta	Dinophyceae	Suessiales	Suessiales_X	Symbiodinium	Multi-affiliation	A
18SV4	Cluster_50	0	0	0	0	0	0	47	0	0	0	0	0	0	0	0	0	Eukaryota	Alveolata	Dinophyta	Dinophyceae	Suessiales	Suessiales_X	Symbiodinium	Symbiodinium_sp.	C
18SV4	Cluster_500	0	0	0	3	0	0	0	0	0	0	0	0	0	0	0	0	Eukaryota	Alveolata	Dinophyta	Dinophyceae	Suessiales	Suessiales_X	Symbiodinium	Symbiodinium_sp.	C
18SV4	Cluster_50379	0	0	0	0	0	0	0	0	0	0	0	0	0	0	3	0	Eukaryota	Alveolata	Dinophyta	Dinophyceae	Suessiales	Suessiales_X	Symbiodinium	Multi-affiliation	A
18SV4	Cluster_50389	0	0	0	0	0	0	0	0	0	0	0	0	0	0	3	0	Eukaryota	Alveolata	Dinophyta	Dinophyceae	Suessiales	Suessiales_X	Symbiodinium	Multi-affiliation	A
18SV4	Cluster_50587	0	0	0	0	0	0	0	0	0	0	0	0	0	0	3	0	Eukaryota	Alveolata	Dinophyta	Dinophyceae	Suessiales	Suessiales_X	Symbiodinium	Multi-affiliation	A
18SV4	Cluster_506	0	0	0	0	0	3	0	0	0	0	0	0	0	0	0	0	Eukaryota	Alveolata	Dinophyta	Dinophyceae	Suessiales	Suessiales_X	Symbiodinium	Multi-affiliation	D
18SV4	Cluster_50650	0	0	0	0	0	0	0	0	0	0	0	0	0	0	0	3	Eukaryota	Alveolata	Dinophyta	Dinophyceae	Suessiales	Suessiales_X	Symbiodinium	Multi-affiliation	A
18SV4	Cluster_50687	0	0	0	0	0	0	0	0	0	0	0	0	0	0	0	3	Eukaryota	Alveolata	Dinophyta	Dinophyceae	Suessiales	Suessiales_X	Symbiodinium	Multi-affiliation	A
18SV4	Cluster_507	0	0	0	0	0	0	0	0	3	0	0	0	0	0	0	0	Eukaryota	Alveolata	Dinophyta	Dinophyceae	Suessiales	Suessiales_X	Symbiodinium	Symbiodinium_sp.	C
18SV4	Cluster_50758	0	0	0	0	0	0	0	0	0	0	0	0	0	0	0	3	Eukaryota	Alveolata	Dinophyta	Dinophyceae	Suessiales	Suessiales_X	Symbiodinium	Multi-affiliation	A
18SV4	Cluster_51	0	41	0	0	0	0	0	0	0	0	0	0	0	0	0	0	Eukaryota	Alveolata	Dinophyta	Dinophyceae	Suessiales	Suessiales_X	Symbiodinium	Symbiodinium_sp.	unknown
18SV4	Cluster_51072	0	0	0	0	0	0	0	0	0	0	0	0	0	0	0	3	Eukaryota	Alveolata	Dinophyta	Dinophyceae	Suessiales	Suessiales_X	Symbiodinium	Multi-affiliation	A
18SV4	Cluster_511	0	0	0	0	0	0	0	3	0	0	0	0	0	0	0	0	Eukaryota	Alveolata	Dinophyta	Dinophyceae	Suessiales	Suessiales_X	Symbiodinium	Symbiodinium_sp.	C
18SV4	Cluster_516	0	0	0	0	0	0	0	3	0	0	0	0	0	0	0	0	Eukaryota	Alveolata	Dinophyta	Dinophyceae	Suessiales	Suessiales_X	Symbiodinium	Symbiodinium_sp.	C
18SV4	Cluster_518	0	0	0	0	0	0	0	0	0	3	0	0	0	0	0	0	Eukaryota	Alveolata	Dinophyta	Dinophyceae	Suessiales	Suessiales_X	Symbiodinium	Multi-affiliation	D
18SV4	Cluster_51899	0	0	0	0	0	0	0	0	0	0	0	0	0	0	0	3	Eukaryota	Alveolata	Dinophyta	Dinophyceae	Suessiales	Suessiales_X	Symbiodinium	Symbiodinium_sp.	unknown
18SV4	Cluster_52	0	0	0	0	0	0	0	0	0	0	0	0	0	0	0	42	Eukaryota	Alveolata	Dinophyta	Dinophyceae	Suessiales	Suessiales_X	Symbiodinium	Multi-affiliation	A
18SV4	Cluster_523	0	0	0	0	0	0	0	0	0	3	0	0	0	0	0	0	Eukaryota	Alveolata	Dinophyta	Dinophyceae	Suessiales	Suessiales_X	Symbiodinium	Multi-affiliation	D
18SV4	Cluster_53	0	36	0	0	0	0	0	0	0	0	0	0	0	0	0	0	Eukaryota	Alveolata	Dinophyta	Dinophyceae	Suessiales	Suessiales_X	Symbiodinium	Symbiodinium_sp.	unknown
18SV4	Cluster_53093	0	0	0	0	3	0	0	0	0	0	0	0	0	0	0	0	Eukaryota	Alveolata	Dinophyta	Dinophyceae	Suessiales	Suessiales_X	Symbiodinium	Symbiodinium_sp.	C
18SV4	Cluster_533	0	0	0	0	0	3	0	0	0	0	0	0	0	0	0	0	Eukaryota	Alveolata	Dinophyta	Dinophyceae	Suessiales	Suessiales_X	Symbiodinium	Symbiodinium_sp.	C
18SV4	Cluster_534	0	0	0	0	0	0	0	0	0	3	0	0	0	0	0	0	Eukaryota	Alveolata	Dinophyta	Dinophyceae	Suessiales	Suessiales_X	Symbiodinium	Symbiodinium_sp.	C
18SV4	Cluster_535	0	0	0	0	0	0	0	0	0	4	0	0	0	0	0	0	Eukaryota	Alveolata	Dinophyta	Dinophyceae	Suessiales	Suessiales_X	Symbiodinium	Multi-affiliation	D
18SV4	Cluster_53702	0	0	0	3	0	0	0	0	0	0	0	0	0	0	0	0	Eukaryota	Alveolata	Dinophyta	Dinophyceae	Suessiales	Suessiales_X	Symbiodinium	Symbiodinium_sp.	C
18SV4	Cluster_539	0	0	0	0	0	0	0	0	3	0	0	0	0	0	0	0	Eukaryota	Alveolata	Dinophyta	Dinophyceae	Suessiales	Suessiales_X	Symbiodinium	Symbiodinium_sp.	C
18SV4	Cluster_541	0	0	0	0	0	0	0	0	0	0	0	0	4	0	0	0	Eukaryota	Alveolata	Dinophyta	Dinophyceae	Suessiales	Suessiales_X	Symbiodinium	Multi-affiliation	A
18SV4	Cluster_549	0	0	0	0	4	0	0	0	0	0	0	0	0	0	0	0	Eukaryota	Alveolata	Dinophyta	Dinophyceae	Suessiales	Suessiales_X	Symbiodinium	Symbiodinium_sp.	C
18SV4	Cluster_55	0	0	0	0	0	0	0	0	36	0	0	0	0	0	0	0	Eukaryota	Alveolata	Dinophyta	Dinophyceae	Suessiales	Suessiales_X	Symbiodinium	Symbiodinium_sp.	C
18SV4	Cluster_56	0	0	0	0	0	0	0	0	0	0	0	0	0	0	0	32	Eukaryota	Alveolata	Ciliophora	Spirotrichea	Licnophoria	Licnophoridae	Licnophora	Licnophora_macfarlandi	-
18SV4	Cluster_56101	0	0	0	0	0	3	0	0	0	0	0	0	0	0	0	0	Eukaryota	Alveolata	Dinophyta	Dinophyceae	Suessiales	Suessiales_X	Symbiodinium	Symbiodinium_sp.	C
18SV4	Cluster_564	0	0	0	0	0	0	0	0	0	0	0	3	0	0	0	0	Eukaryota	Alveolata	Dinophyta	Dinophyceae	Suessiales	Suessiales_X	Symbiodinium	Symbiodinium_sp.	unknown
18SV4	Cluster_566	0	0	0	0	0	0	0	0	0	0	0	0	0	3	0	0	Eukaryota	Alveolata	Dinophyta	Dinophyceae	Suessiales	Suessiales_X	Symbiodinium	Symbiodinium_sp.	unknown
18SV4	Cluster_569	0	0	0	0	0	0	0	0	0	0	4	0	0	0	0	0	Eukaryota	Alveolata	Dinophyta	Dinophyceae	Suessiales	Suessiales_X	Symbiodinium	Symbiodinium_sp.	unknown
18SV4	Cluster_57085	0	0	0	0	0	0	0	3	0	0	0	0	0	0	0	0	Eukaryota	Alveolata	Dinophyta	Dinophyceae	Suessiales	Suessiales_X	Symbiodinium	Symbiodinium_sp.	C
18SV4	Cluster_571	0	0	0	0	0	0	0	0	0	3	0	0	0	0	0	0	Eukaryota	Alveolata	Dinophyta	Dinophyceae	Suessiales	Suessiales_X	Symbiodinium	Symbiodinium_sp.	C
18SV4	Cluster_57755	0	0	0	3	0	0	0	0	0	0	0	0	0	0	0	0	Eukaryota	Alveolata	Dinophyta	Dinophyceae	Suessiales	Suessiales_X	Symbiodinium	Symbiodinium_sp.	C
18SV4	Cluster_58	0	0	0	0	0	0	0	0	0	28	0	0	0	0	0	0	Eukaryota	Alveolata	Dinophyta	Dinophyceae	Suessiales	Suessiales_X	Symbiodinium	Symbiodinium_sp.	C
18SV4	Cluster_580	0	0	0	0	0	0	0	0	0	3	0	0	0	0	0	0	Eukaryota	Alveolata	Dinophyta	Dinophyceae	Suessiales	Suessiales_X	Symbiodinium	Symbiodinium_sp.	C
18SV4	Cluster_58380	0	0	0	0	0	0	0	0	0	3	0	0	0	0	0	0	Eukaryota	Alveolata	Dinophyta	Dinophyceae	Suessiales	Suessiales_X	Symbiodinium	Multi-affiliation	D
18SV4	Cluster_587	0	0	0	0	0	0	0	0	4	0	0	0	0	0	0	0	Eukaryota	Alveolata	Dinophyta	Dinophyceae	Suessiales	Suessiales_X	Symbiodinium	Symbiodinium_sp.	C
18SV4	Cluster_59	5	0	0	0	0	0	0	0	0	0	0	31	0	0	0	0	Eukaryota	Alveolata	Dinophyta	Dinophyceae	Suessiales	Suessiales_X	Symbiodinium	Symbiodinium_sp.	unknown
18SV4	Cluster_6	2519	3	63	0	0	0	0	0	0	0	0	0	0	263	0	0	Eukaryota	Opisthokonta	Metazoa	Cnidaria	Cnidaria_X	Anthozoa	Pocillopora	Pocillopora_meandrina	-
18SV4	Cluster_60	0	0	0	0	0	0	9	0	0	23	0	0	0	0	0	0	Eukaryota	Alveolata	Dinophyta	Dinophyceae	Suessiales	Suessiales_X	Symbiodinium	Symbiodinium_sp.	C
18SV4	Cluster_603	0	0	0	0	0	0	0	3	0	0	0	0	0	0	0	0	Eukaryota	Alveolata	Dinophyta	Dinophyceae	Suessiales	Suessiales_X	Symbiodinium	Symbiodinium_sp.	C
18SV4	Cluster_605	0	0	0	0	0	0	0	3	0	0	0	0	0	0	0	0	Eukaryota	Alveolata	Dinophyta	Dinophyceae	Suessiales	Suessiales_X	Symbiodinium	Symbiodinium_sp.	C
18SV4	Cluster_619	0	0	0	0	0	0	0	3	0	0	0	0	0	0	0	0	Eukaryota	Alveolata	Dinophyta	Dinophyceae	Suessiales	Suessiales_X	Symbiodinium	Multi-affiliation	D
18SV4	Cluster_62	0	0	0	0	0	0	0	0	0	25	0	0	0	0	0	0	Eukaryota	Alveolata	Dinophyta	Dinophyceae	Suessiales	Suessiales_X	Symbiodinium	Symbiodinium_sp.	C
18SV4	Cluster_63	0	0	0	0	0	0	0	0	0	30	0	0	0	0	0	0	Eukaryota	Alveolata	Dinophyta	Dinophyceae	Suessiales	Suessiales_X	Symbiodinium	Multi-affiliation	D
18SV4	Cluster_647	0	0	0	0	0	0	3	0	0	0	0	0	0	0	0	0	Eukaryota	Opisthokonta	Metazoa	Cnidaria	Cnidaria_X	Anthozoa	Pocillopora	Pocillopora_meandrina	-
18SV4	Cluster_64740	0	0	0	0	0	0	0	0	0	3	0	0	0	0	0	0	Eukaryota	Alveolata	Dinophyta	Dinophyceae	Suessiales	Suessiales_X	Symbiodinium	Symbiodinium_sp.	C
18SV4	Cluster_65029	0	0	0	0	0	0	0	0	0	3	0	0	0	0	0	0	Eukaryota	Alveolata	Dinophyta	Dinophyceae	Suessiales	Suessiales_X	Symbiodinium	Symbiodinium_sp.	C
18SV4	Cluster_65220	0	0	0	0	0	0	0	0	0	3	0	0	0	0	0	0	Eukaryota	Alveolata	Dinophyta	Dinophyceae	Suessiales	Suessiales_X	Symbiodinium	Symbiodinium_sp.	C
18SV4	Cluster_65729	3	0	0	0	0	0	0	0	0	0	0	0	0	0	0	0	Eukaryota	Alveolata	Dinophyta	Dinophyceae	Suessiales	Suessiales_X	Symbiodinium	Symbiodinium_sp.	unknown
18SV4	Cluster_66	0	0	0	0	0	0	21	0	0	0	0	0	0	0	0	0	Eukaryota	Alveolata	Dinophyta	Dinophyceae	Suessiales	Suessiales_X	Symbiodinium	Multi-affiliation	D
18SV4	Cluster_67	0	0	0	0	0	0	0	0	0	25	0	0	0	0	0	0	Eukaryota	Alveolata	Dinophyta	Dinophyceae	Suessiales	Suessiales_X	Symbiodinium	Multi-affiliation	D
18SV4	Cluster_68253	0	0	0	0	0	0	0	0	0	0	0	0	0	0	3	0	Eukaryota	Alveolata	Dinophyta	Dinophyceae	Suessiales	Suessiales_X	Symbiodinium	Multi-affiliation	A
18SV4	Cluster_683	0	0	0	0	0	0	0	0	3	0	0	0	0	0	0	0	Eukaryota	Opisthokonta	Metazoa	Cnidaria	Cnidaria_X	Anthozoa	Pocillopora	Pocillopora_meandrina	-
18SV4	Cluster_68474	0	0	0	0	0	0	0	0	0	0	0	0	0	3	0	0	Eukaryota	Alveolata	Dinophyta	Dinophyceae	Suessiales	Suessiales_X	Symbiodinium	Symbiodinium_sp.	unknown
18SV4	Cluster_68522	0	0	0	0	0	0	0	0	3	6	0	0	0	0	0	0	Eukaryota	Alveolata	Dinophyta	Dinophyceae	Suessiales	Suessiales_X	Symbiodinium	Symbiodinium_sp.	C
18SV4	Cluster_68851	0	0	0	0	0	0	0	0	0	0	0	0	0	4	0	0	Eukaryota	Alveolata	Dinophyta	Dinophyceae	Suessiales	Suessiales_X	Symbiodinium	Symbiodinium_sp.	unknown
18SV4	Cluster_69	0	0	0	0	0	0	0	0	0	0	0	13	0	0	0	0	Eukaryota	Alveolata	Dinophyta	Dinophyceae	Suessiales	Suessiales_X	Symbiodinium	Symbiodinium_sp.	B
18SV4	Cluster_69012	0	0	0	0	0	0	0	0	0	0	3	0	0	0	0	0	Eukaryota	Alveolata	Dinophyta	Dinophyceae	Suessiales	Suessiales_X	Symbiodinium	Symbiodinium_sp.	unknown
18SV4	Cluster_69047	0	0	0	0	0	0	0	0	0	0	3	0	0	0	0	0	Eukaryota	Alveolata	Dinophyta	Dinophyceae	Suessiales	Suessiales_X	Symbiodinium	Symbiodinium_sp.	unknown
18SV4	Cluster_69088	0	3	0	0	0	0	0	0	0	0	0	0	0	0	0	0	Eukaryota	Alveolata	Dinophyta	Dinophyceae	Suessiales	Suessiales_X	Symbiodinium	Symbiodinium_sp.	unknown
18SV4	Cluster_695	0	0	0	0	0	0	0	3	0	0	0	0	0	0	0	0	Eukaryota	Opisthokonta	Metazoa	Cnidaria	Cnidaria_X	Anthozoa	Pocillopora	Pocillopora_meandrina	-
18SV4	Cluster_7	0	0	0	0	3	0	1025	1411	0	0	0	0	0	0	0	0	Eukaryota	Alveolata	Ciliophora	Spirotrichea	Licnophoria	Licnophoridae	Licnophora	Licnophora_macfarlandi	-
18SV4	Cluster_70	0	0	0	0	0	0	0	0	0	18	0	0	0	0	0	0	Eukaryota	Alveolata	Dinophyta	Dinophyceae	Suessiales	Suessiales_X	Symbiodinium	Multi-affiliation	D
18SV4	Cluster_70234	0	0	0	0	0	0	0	0	0	3	0	0	0	0	0	0	Eukaryota	Alveolata	Dinophyta	Dinophyceae	Suessiales	Suessiales_X	Symbiodinium	Symbiodinium_sp.	C
18SV4	Cluster_70299	3	0	0	0	0	0	0	0	0	0	0	0	0	0	0	0	Eukaryota	Alveolata	Dinophyta	Dinophyceae	Suessiales	Suessiales_X	Symbiodinium	Symbiodinium_sp.	unknown
18SV4	Cluster_70961	0	0	0	0	0	0	0	0	0	0	0	0	0	0	0	3	Eukaryota	Alveolata	Dinophyta	Dinophyceae	Suessiales	Suessiales_X	Symbiodinium	Symbiodinium_sp.	unknown
18SV4	Cluster_71	0	0	0	0	0	0	0	0	0	0	0	0	0	0	10	27	Eukaryota	Alveolata	Dinophyta	Dinophyceae	Suessiales	Suessiales_X	Symbiodinium	Multi-affiliation	A
18SV4	Cluster_72	0	0	0	18	0	0	0	0	0	0	0	0	0	0	0	0	Eukaryota	Alveolata	Dinophyta	Dinophyceae	Suessiales	Suessiales_X	Symbiodinium	Multi-affiliation	D
18SV4	Cluster_72687	0	0	0	0	0	0	0	0	3	0	0	0	0	0	0	0	Eukaryota	Alveolata	Dinophyta	Dinophyceae	Suessiales	Suessiales_X	Symbiodinium	Symbiodinium_sp.	C
18SV4	Cluster_728	0	0	0	0	3	0	0	0	0	0	0	0	0	0	0	0	Eukaryota	Opisthokonta	Metazoa	Cnidaria	Cnidaria_X	Anthozoa	Pocillopora	Pocillopora_meandrina	-
18SV4	Cluster_73	0	0	0	0	0	0	0	0	0	0	0	0	14	0	0	0	Eukaryota	Alveolata	Dinophyta	Dinophyceae	Suessiales	Suessiales_X	Symbiodinium	Multi-affiliation	A
18SV4	Cluster_74	14	0	0	0	0	0	0	0	0	0	0	0	0	0	0	0	Eukaryota	Alveolata	Dinophyta	Dinophyceae	Suessiales	Suessiales_X	Symbiodinium	Symbiodinium_sp.	B
18SV4	Cluster_745	0	0	0	0	0	0	3	0	0	0	0	0	0	0	0	0	Eukaryota	Alveolata	Dinophyta	Dinophyceae	Suessiales	Suessiales_X	Symbiodinium	Symbiodinium_sp.	C
18SV4	Cluster_746	0	0	0	0	0	0	0	0	0	3	0	0	0	0	0	0	Eukaryota	Alveolata	Dinophyta	Dinophyceae	Suessiales	Suessiales_X	Symbiodinium	Symbiodinium_sp.	D
18SV4	Cluster_75	0	0	0	0	0	0	0	0	0	17	0	0	0	0	0	0	Eukaryota	Alveolata	Dinophyta	Dinophyceae	Suessiales	Suessiales_X	Symbiodinium	Symbiodinium_sp.	C
18SV4	Cluster_750	0	0	3	0	0	0	0	0	0	0	0	0	0	0	0	0	Eukaryota	Alveolata	Dinophyta	Dinophyceae	Suessiales	Suessiales_X	Symbiodinium	Symbiodinium_sp.	unknown
18SV4	Cluster_754	0	0	0	0	0	0	0	0	0	0	0	0	3	0	0	0	Eukaryota	Alveolata	Dinophyta	Dinophyceae	Suessiales	Suessiales_X	Symbiodinium	Multi-affiliation	unknown
18SV4	Cluster_76	5	3	0	0	0	0	0	0	0	0	0	0	0	6	0	0	Eukaryota	Alveolata	Apicomplexa	Apicomplexa_X	Coccidia	Coccidia_X	Coccidia_XX	Coccidia_XX_sp.	-
18SV4	Cluster_77	0	0	0	0	0	0	0	0	0	0	0	0	0	0	0	13	Eukaryota	Alveolata	Apicomplexa	Apicomplexa_X	Coccidia	Coccidia_X	Coccidia_XX	Coccidia_XX_sp.	-
18SV4	Cluster_773	0	0	0	0	0	0	0	0	0	0	0	0	0	0	3	0	Eukaryota	Alveolata	Dinophyta	Dinophyceae	Suessiales	Suessiales_X	Symbiodinium	Symbiodinium_sp.	A
18SV4	Cluster_783	0	0	0	0	0	0	3	0	0	0	0	0	0	0	0	0	Eukaryota	Alveolata	Dinophyta	Dinophyceae	Suessiales	Suessiales_X	Symbiodinium	Symbiodinium_sp.	C
18SV4	Cluster_787	0	0	0	0	0	0	0	0	0	0	0	0	3	0	0	0	Eukaryota	Alveolata	Dinophyta	Dinophyceae	Suessiales	Suessiales_X	Symbiodinium	Multi-affiliation	A
18SV4	Cluster_788	0	0	0	0	0	0	0	0	0	0	0	0	0	0	0	3	Eukaryota	Alveolata	Dinophyta	Syndiniales	Dino-Group-I	Dino-Group-I-Clade-4	Dino-Group-I-Clade-4_X	Dino-Group-I-Clade-4_X_sp.	-
18SV4	Cluster_79	0	0	0	0	0	0	0	11	0	0	0	0	0	0	0	0	Eukaryota	Alveolata	Dinophyta	Dinophyceae	Suessiales	Suessiales_X	Symbiodinium	Symbiodinium_sp.	C
18SV4	Cluster_8	0	0	0	0	0	0	0	0	0	0	0	0	569	0	171	135	Eukaryota	Alveolata	Dinophyta	Dinophyceae	Suessiales	Suessiales_X	Symbiodinium	Multi-affiliation	A
18SV4	Cluster_80	10	0	0	0	0	0	0	0	0	0	0	0	0	0	0	0	Eukaryota	Alveolata	Dinophyta	Dinophyceae	Suessiales	Suessiales_X	Symbiodinium	Symbiodinium_sp.	unknown
18SV4	Cluster_837	0	0	0	3	0	0	0	0	0	0	0	0	0	0	0	0	Eukaryota	Alveolata	Dinophyta	Dinophyceae	Suessiales	Suessiales_X	Symbiodinium	Symbiodinium_sp.	C
18SV4	Cluster_842	0	0	0	0	0	0	5	0	0	0	0	0	0	0	0	0	Eukaryota	Alveolata	Dinophyta	Dinophyceae	Suessiales	Suessiales_X	Symbiodinium	Symbiodinium_sp.	C
18SV4	Cluster_854	0	0	0	0	0	0	3	0	0	0	0	0	0	0	0	0	Eukaryota	Alveolata	Dinophyta	Dinophyceae	Suessiales	Suessiales_X	Symbiodinium	Symbiodinium_sp.	C
18SV4	Cluster_855	0	0	0	0	0	0	0	0	0	4	0	0	0	0	0	0	Eukaryota	Alveolata	Dinophyta	Dinophyceae	Suessiales	Suessiales_X	Symbiodinium	Symbiodinium_sp.	C
18SV4	Cluster_856	0	0	0	0	0	0	0	0	0	3	0	0	0	0	0	0	Eukaryota	Alveolata	Dinophyta	Dinophyceae	Suessiales	Suessiales_X	Symbiodinium	Symbiodinium_sp.	C
18SV4	Cluster_86	0	0	7	0	0	0	0	0	0	0	0	0	0	0	0	0	Eukaryota	Archaeplastida	Streptophyta	Embryophyceae	Embryophyceae_X	Embryophyceae_XX	Multi-affiliation	Multi-affiliation	-
18SV4	Cluster_861	0	0	0	0	0	0	0	0	0	7	0	0	0	0	0	0	Eukaryota	Alveolata	Dinophyta	Dinophyceae	Suessiales	Suessiales_X	Symbiodinium	Symbiodinium_sp.	C
18SV4	Cluster_868	0	0	0	0	0	0	0	0	0	3	0	0	0	0	0	0	Eukaryota	Alveolata	Dinophyta	Dinophyceae	Suessiales	Suessiales_X	Symbiodinium	Symbiodinium_sp.	C
18SV4	Cluster_87	0	10	0	0	0	0	0	0	0	0	0	0	0	0	0	0	Eukaryota	Alveolata	Dinophyta	Dinophyceae	Suessiales	Suessiales_X	Symbiodinium	Symbiodinium_sp.	unknown
18SV4	Cluster_870	0	0	0	0	0	0	0	0	0	3	0	0	0	0	0	0	Eukaryota	Alveolata	Dinophyta	Dinophyceae	Suessiales	Suessiales_X	Symbiodinium	Symbiodinium_sp.	C
18SV4	Cluster_874	0	0	0	0	0	0	0	0	0	4	0	0	0	0	0	0	Eukaryota	Alveolata	Dinophyta	Dinophyceae	Suessiales	Suessiales_X	Symbiodinium	Symbiodinium_sp.	C
18SV4	Cluster_883	0	0	0	0	0	0	0	0	0	0	0	0	0	0	5	6	Eukaryota	Alveolata	Dinophyta	Dinophyceae	Suessiales	Suessiales_X	Symbiodinium	Multi-affiliation	A
18SV4	Cluster_889	0	0	0	0	0	0	0	0	0	0	0	0	0	0	3	0	Eukaryota	Alveolata	Dinophyta	Dinophyceae	Suessiales	Suessiales_X	Symbiodinium	Multi-affiliation	A
18SV4	Cluster_89	0	0	0	0	0	0	5	0	0	0	0	0	0	0	0	0	Eukaryota	Alveolata	Dinophyta	Dinophyceae	Suessiales	Suessiales_X	Symbiodinium	Multi-affiliation	D
18SV4	Cluster_9	0	0	0	0	454	339	0	0	0	0	0	0	0	0	0	0	Eukaryota	Alveolata	Dinophyta	Dinophyceae	Suessiales	Suessiales_X	Symbiodinium	Symbiodinium_sp.	C
18SV4	Cluster_907	0	0	0	0	0	3	0	0	0	0	0	0	0	0	0	0	Eukaryota	Alveolata	Dinophyta	Dinophyceae	Suessiales	Suessiales_X	Symbiodinium	Symbiodinium_sp.	C
18SV4	Cluster_91	0	0	0	0	0	0	0	0	6	0	0	0	0	0	0	0	Eukaryota	Alveolata	Dinophyta	Dinophyceae	Suessiales	Suessiales_X	Symbiodinium	Symbiodinium_sp.	C
18SV4	Cluster_922	0	0	0	0	0	0	0	0	0	3	0	0	0	0	0	0	Eukaryota	Alveolata	Dinophyta	Dinophyceae	Suessiales	Suessiales_X	Symbiodinium	Symbiodinium_sp.	D
18SV4	Cluster_93	0	0	0	0	0	0	0	0	0	0	0	0	0	0	0	14	Eukaryota	Multi-affiliation	Multi-affiliation	Multi-affiliation	Multi-affiliation	Multi-affiliation	Multi-affiliation	Multi-affiliation	-
18SV4	Cluster_933	0	0	0	0	0	0	0	0	0	0	0	0	0	0	0	3	Eukaryota	Alveolata	Dinophyta	Dinophyceae	Suessiales	Suessiales_X	Symbiodinium	Multi-affiliation	A
18SV4	Cluster_939	0	0	0	0	0	0	0	0	0	4	0	0	0	0	0	0	Eukaryota	Alveolata	Dinophyta	Dinophyceae	Suessiales	Suessiales_X	Symbiodinium	Symbiodinium_sp.	C
18SV4	Cluster_942	0	0	0	0	0	0	0	0	3	0	0	0	0	0	0	0	Eukaryota	Alveolata	Dinophyta	Dinophyceae	Suessiales	Suessiales_X	Symbiodinium	Symbiodinium_sp.	C
18SV4	Cluster_945	0	0	0	4	0	0	0	0	0	0	0	0	0	0	0	0	Eukaryota	Alveolata	Dinophyta	Dinophyceae	Suessiales	Suessiales_X	Symbiodinium	Symbiodinium_sp.	C
18SV4	Cluster_9458	0	0	0	0	3	0	0	0	0	0	0	0	0	0	0	0	Eukaryota	Opisthokonta	Metazoa	Cnidaria	Cnidaria_X	Anthozoa	Pocillopora	Pocillopora_meandrina	-
18SV4	Cluster_946	0	0	0	3	0	0	0	0	0	0	0	0	0	0	0	0	Eukaryota	Alveolata	Dinophyta	Dinophyceae	Suessiales	Suessiales_X	Symbiodinium	Symbiodinium_sp.	C
18SV4	Cluster_96	5	0	0	0	0	0	0	0	0	0	0	0	0	0	0	0	Eukaryota	Alveolata	Dinophyta	Dinophyceae	Suessiales	Suessiales_X	Symbiodinium	Symbiodinium_sp.	unknown
18SV4	Cluster_97	0	0	0	0	0	0	0	0	0	0	0	0	0	7	0	0	Eukaryota	Alveolata	Dinophyta	Dinophyceae	Suessiales	Suessiales_X	Symbiodinium	Symbiodinium_sp.	unknown
18SV4	Cluster_970	0	0	0	0	0	0	0	0	3	0	0	0	0	0	0	0	Eukaryota	Alveolata	Dinophyta	Dinophyceae	Suessiales	Suessiales_X	Symbiodinium	Symbiodinium_sp.	C
18SV4	Cluster_98	0	0	0	0	0	0	4	0	0	0	0	0	0	0	0	0	Eukaryota	Opisthokonta	Metazoa	Arthropoda	Crustacea	Maxillopoda	Xarifia	Xarifia_sp.	-
18SV4	Cluster_980	0	0	0	0	0	0	0	0	0	0	3	0	0	0	0	0	Eukaryota	Alveolata	Dinophyta	Dinophyceae	Suessiales	Suessiales_X	Symbiodinium	Symbiodinium_sp.	unknown
18SV4	Cluster_99	0	0	0	0	0	0	0	0	0	6	0	0	0	0	0	0	Eukaryota	Alveolata	Dinophyta	Dinophyceae	Suessiales	Suessiales_X	Symbiodinium	Symbiodinium_sp.	C
