# Supplementary material for: Protists Within Corals: The Hidden Diversity
Source: Front Microbiol. 2018 Aug 31;9:2043. doi: 10.3389/fmicb.2018.02043 (PMC6127297; doi:10.3389/fmicb.2018.02043)
Supplement: Supplementary file 9 [file Table_5.xlsx]

## Sheet: Supplementary Table 5
Supplementary Table 5. Abundances and annotations of protist genera.
Marker region	Representative OTU	DJMI5	DJMI6	DJMI7	NCGR1	NCGR4	NCGR6	NCBM1	NCBM3	NCBM4	NCBS3	DJRK1	DJRK3	DJRK4	DJRK5	DJRK7	DJSB6	kingdom	phylum	division	class	order	family	genus
18SV1V2	Cluster_2	14711	44176	34801	7399	10830	17772	5457	9982	12131	5679	13041	14011	18459	32411	10233	7687	Eukaryota	Alveolata	Dinophyta	Dinophyceae	Suessiales	Suessiales_X	Symbiodinium
18SV1V2	Cluster_8	0	0	0	4	0	0	1796	1235	0	0	0	0	0	0	0	575	Eukaryota	Alveolata	Ciliophora	Spirotrichea	Licnophoria	Licnophoridae	Licnophora
18SV1V2	Cluster_12	748	324	805	0	0	0	0	87	0	0	340	94	91	1005	5	276	Eukaryota	Alveolata	Apicomplexa	Apicomplexa_X	Coccidia	Coccidia-un.-Symbiont	Coccidia-un.-Symbiont_X
18SV1V2	Cluster_44	0	0	0	0	20	20	0	0	0	0	0	0	0	0	0	0	Eukaryota	Stramenopiles	Ochrophyta	Bacillariophyta	Bacillariophyta_X	Polar-centric-Mediophyceae	Multi-affiliation
18SV1V2	Cluster_45	0	5	3	0	4	3	3	3	3	9	3	6	3	0	0	4	Eukaryota	Alveolata	Dinophyta	Dinophyceae	Suessiales	Suessiales_X	Multi-affiliation
18SV1V2	Cluster_55	0	0	0	0	0	0	0	0	0	0	0	0	0	0	0	22	Eukaryota	Stramenopiles	Ochrophyta	Bacillariophyta	Bacillariophyta_X	Raphid-pennate	Multi-affiliation
18SV1V2	Cluster_59	0	0	0	0	0	0	0	0	0	0	19	0	0	0	0	0	Eukaryota	Opisthokonta	Fungi	Basidiomycota	Agaricomycotina	Agaricomycetes	Clitocybe
18SV1V2	Cluster_62	0	0	0	0	14	0	0	0	0	0	0	0	0	0	0	0	Eukaryota	Alveolata	Ciliophora	Phyllopharyngea	Suctoria	Acinetidae	Acineta
18SV1V2	Cluster_66	0	0	0	0	17	0	0	0	0	0	0	0	0	0	0	0	Eukaryota	Alveolata	Ciliophora	Oligohymenophorea	Peritrichia	Zoothamniidae	Zoothamnopsis
18SV1V2	Cluster_70	0	0	0	0	10	0	0	0	0	0	0	0	0	0	0	0	Eukaryota	Alveolata	Dinophyta	Dinophyceae	Dinophyceae_X	Dinophyceae_XX	Prorocentrum
18SV1V2	Cluster_76	0	0	0	0	12	0	0	0	0	0	0	0	0	0	0	0	Eukaryota	Stramenopiles	Ochrophyta	Bacillariophyta	Bacillariophyta_X	Raphid-pennate	Navicula
18SV1V2	Cluster_78	0	0	0	0	3	0	0	0	0	0	0	0	0	0	0	0	Eukaryota	Alveolata	Ciliophora	Spirotrichea	Choreotrichia	Dictyocystidae	Codonellopsis
18SV1V2	Cluster_84	0	0	0	0	0	0	0	0	0	0	0	0	0	0	0	4	Eukaryota	Alveolata	Dinophyta	Syndiniales	Dino-Group-I	Dino-Group-I-Clade-1	Dino-Group-I-Clade-1_X
18SV1V2	Cluster_86	0	8	0	0	0	0	0	0	0	0	0	0	0	0	0	0	Eukaryota	Opisthokonta	Fungi	Basidiomycota	Agaricomycotina	Agaricomycetes	Rogersella
18SV1V2	Cluster_89	0	0	0	0	0	0	0	0	0	0	5	0	0	0	0	0	Eukaryota	Opisthokonta	Fungi	Basidiomycota	Agaricomycotina	Agaricomycetes	Agaricomycetes_X
18SV1V2	Cluster_93	0	0	0	0	5	0	0	0	0	0	0	0	0	0	0	0	Eukaryota	Rhizaria	Cercozoa	Filosa-Thecofilosea	Cryomonadida	Protaspa-lineage	Protaspa
18SV1V2	Cluster_111	0	0	0	0	4	0	0	0	0	0	0	0	0	0	0	0	Eukaryota	Opisthokonta	Fungi	Multi-affiliation	Multi-affiliation	Multi-affiliation	Multi-affiliation
18SV1V2	Cluster_112	0	0	0	0	0	0	0	0	0	0	0	0	3	0	0	0	Eukaryota	Opisthokonta	Fungi	Ascomycota	Pezizomycotina	Multi-affiliation	Multi-affiliation
18SV1V2	Cluster_126	0	0	0	0	0	0	0	0	0	0	0	0	0	3	0	0	Eukaryota	Opisthokonta	Fungi	Basidiomycota	Agaricomycotina	Agaricomycetes	Itersonilia
18SV1V2	Cluster_160	0	0	0	0	0	3	0	0	0	0	0	0	0	0	0	0	Eukaryota	Alveolata	Dinophyta	Dinophyceae	Dinophyceae_X	Dinophyceae_XX	Scrippsiella
18SV1V2	Cluster_266	6	0	0	0	0	0	0	0	0	0	0	0	0	0	0	0	Eukaryota	Opisthokonta	Fungi	Basidiomycota	Agaricomycotina	Agaricomycetes	Dentocorticium
18SV4	Cluster_2	19571	15771	6121	19731	21085	24013	15315	19748	24474	36272	9893	15391	32409	12526	35575	21843	Eukaryota	Alveolata	Dinophyta	Dinophyceae	Suessiales	Suessiales_X	Symbiodinium
18SV4	Cluster_7	0	0	0	0	3	0	1025	1411	0	0	0	0	0	0	0	32	Eukaryota	Alveolata	Ciliophora	Spirotrichea	Licnophoria	Licnophoridae	Licnophora
18SV4	Cluster_15	0	0	0	0	0	0	0	0	0	0	3	104	107	3	7	107	Eukaryota	Alveolata	Dinophyta	Syndiniales	Dino-Group-I	Dino-Group-I-Clade-1	Dino-Group-I-Clade-1_X
18SV4	Cluster_21	5	9	3	0	0	0	0	23	89	0	0	28	0	22	4	20	Eukaryota	Alveolata	Apicomplexa	Apicomplexa_X	Coccidia	Coccidia_X	Coccidia_XX
18SV4	Cluster_93	0	0	0	0	0	0	0	0	0	0	0	0	3	0	3	14	Eukaryota	Multi-affiliation	Multi-affiliation	Multi-affiliation	Multi-affiliation	Multi-affiliation	Multi-affiliation
18SV4	Cluster_114	0	0	0	0	0	3	0	0	0	0	0	0	0	0	0	0	Eukaryota	Alveolata	Dinophyta	Dinophyceae	Suessiales	Suessiales_X	Woloszynskia
18SV4	Cluster_186	0	0	0	0	0	0	0	0	0	0	0	0	0	0	0	7	Eukaryota	Alveolata	Dinophyta	Syndiniales	Dino-Group-I	Dino-Group-I-Clade-4	Dino-Group-I-Clade-4_X
